# Supplementary material
Source: publisher figshare collection journal article supplement (https://tandf.figshare.com/articles/dataset/_/6741470)
Supplement: Supplementary file 1 [file 1]

**Supplementary Table S5. Enriched GO terms in genes specifically upregulated by milder Cu stress**

| Enriched GO-BP term                     | Expected | Fold Enrichment | FDR       |
|-----------------------------------------|----------|-----------------|-----------|
| ethylene-activated signaling pathway    | 0.5      | 11.98           | 0.0043    |
| response to hormone                     | 4.56     | 4.17            | 0.000153  |
| response to organic substance           | 5.27     | 3.6             | 0.000559  |
| response to chemical                    | 7.45     | 3.09            | 0.00056   |
| response to stimulus                    | 16.03    | 2.5             | 0.0000374 |
| response to endogenous stimulus         | 4.59     | 4.14            | 0.00014   |
| regulation of biological process        | 13.51    | 2.07            | 0.0427    |
| biological regulation                   | 15.18    | 1.98            | 0.0499    |
| cellular response to ethylene stimulus  | 0.56     | 10.75           | 0.00656   |
| response to ethylene                    | 0.86     | 9.35            | 0.0011    |
| phosphorelay signal transduction system | 0.62     | 9.69            | 0.0109    |
| response to jasmonic acid               | 0.62     | 11.31           | 0.00124   |
| response to acid chemical               | 3.15     | 4.44            | 0.00127   |
| response to oxygen-containing compound  | 4.06     | 3.69            | 0.00407   |
| response to bacterium                   | 1.21     | 5.81            | 0.048     |
| response to other organism              | 3.44     | 4.65            | 0.000251  |
| response to external biotic stimulus    | 3.45     | 4.64            | 0.00023   |
| response to external stimulus           | 4.46     | 3.82            | 0.000936  |
| response to biotic stimulus             | 3.58     | 4.74            | 0.000159  |
| multi-organism process                  | 4.72     | 3.39            | 0.00549   |
| defense response to other organism      | 2.61     | 5.36            | 0.000218  |
| defense response                        | 4.29     | 4.66            | 0.0000571 |
| response to stress                      | 9.18     | 3.16            | 0.0000349 |
| oxidation-reduction process             | 3.96     | 3.28            | 0.0414    |
| metabolic process                       | 27.26    | 1.94            | 0.000135  |

Analyzed by PANTHER classification system (<http://www.pantherdb.org/>).
