# Supplementary material
Source: publisher figshare collection journal article supplement (https://tandf.figshare.com/articles/dataset/_/6741470)
Supplement: Supplementary file 2 [file 1]

**Supplementary Table S8. Overlapped genes between Cd and Cu stressors in different stress intensities.**

| Gene ID                          | Description                                                  | Average log <sub>2</sub> FC value under mild |     |     |      | Average log <sub>2</sub> FC value under |     |     |     |
|----------------------------------|--------------------------------------------------------------|----------------------------------------------|-----|-----|------|-----------------------------------------|-----|-----|-----|
|                                  |                                                              | Al                                           | Cd  | Cu  | Na   | Al                                      | Cd  | Cu  | Na  |
| Common in severe and mild stress |                                                              |                                              |     |     |      |                                         |     |     |     |
| AT1G01680                        | U-box domain-containing protein 54                           | 4.4                                          | 3.8 | 2.6 | 1.9  | 4.0                                     | 3.7 | 3.8 | 3.0 |
| AT1G09080                        | protein BIP3                                                 | 3.9                                          | 7.0 | 6.3 | 1.2  | 1.1                                     | 6.6 | 4.0 | 1.4 |
| AT1G11925                        | stigma-specific stig1 family protein                         | 2.9                                          | 3.3 | 6.0 | -0.2 | 0.4                                     | 4.9 | 5.6 | 1.1 |
| AT1G26420                        | FAD-binding and BBE domain-containing protein                | 2.5                                          | 3.2 | 2.4 | 2.0  | 2.3                                     | 4.5 | 3.6 | 3.0 |
| AT1G35910                        | probable trehalose-phosphate phosphatase D                   | 3.7                                          | 2.4 | 2.1 | 0.8  | 3.6                                     | 3.3 | 4.6 | 2.0 |
| AT1G57630                        | Toll-Interleukin-Resistance domain-containing protein        | 3.7                                          | 4.0 | 4.2 | 1.8  | 2.4                                     | 4.5 | 5.1 | 2.9 |
| AT1G64160                        | dirigent-like protein DIR5                                   | 4.3                                          | 5.4 | 6.6 | 3.3  | 2.6                                     | 6.0 | 5.1 | 4.1 |
| AT1G66090                        | TIR-NBS class of disease resistance protein                  | 4.0                                          | 3.0 | 2.2 | 0.2  | 1.4                                     | 3.4 | 3.9 | 3.0 |
| AT1G68620                        | probable carboxylesterase 6                                  | 3.7                                          | 3.4 | 3.6 | 0.6  | 2.8                                     | 4.1 | 4.4 | 2.2 |
| AT1G69490                        | NAC transcription factor protein family                      | 4.8                                          | 3.6 | 3.5 | 0.9  | 2.4                                     | 4.2 | 5.2 | 1.6 |
| AT1G70130                        | putative L-type lectin-domain containing receptor kinase V.2 | 5.9                                          | 4.5 | 6.4 | 1.0  | 2.9                                     | 5.8 | 5.7 | 4.5 |
| AT1G70810                        | Calcium-dependent lipid-binding (CaLB domain) family protein | 0.8                                          | 2.4 | 2.3 | 0.4  | 1.9                                     | 3.8 | 3.9 | 1.6 |
| AT1G72900                        | Toll-Interleukin-Resistance domain-containing protein        | 1.6                                          | 2.8 | 2.7 | 1.1  | 1.9                                     | 4.5 | 3.8 | 1.6 |
| AT1G73260                        | kunitz trypsin inhibitor 1                                   | 3.5                                          | 2.8 | 5.3 | 0.1  | 2.1                                     | 4.9 | 5.9 | 1.4 |
| AT1G79680                        | wall-associated receptor kinase-like 10                      | 3.7                                          | 2.9 | 5.9 | 2.1  | 0.4                                     | 3.0 | 3.4 | 0.8 |
| AT2G02930                        | glutathione S-transferase F3                                 | 2.4                                          | 3.6 | 4.6 | 1.3  | 2.6                                     | 4.4 | 4.4 | 3.1 |
| AT2G02990                        | ribonuclease 1                                               | 4.5                                          | 3.3 | 2.4 | 0.1  | 3.9                                     | 3.8 | 5.4 | 3.4 |
| AT2G15780                        | Cupredoxin superfamily protein                               | 4.6                                          | 4.4 | 6.3 | 0.6  | 2.2                                     | 6.3 | 5.9 | 3.8 |
| AT2G18150                        | peroxidase 15                                                | 1.6                                          | 3.2 | 3.1 | 0.9  | 1.7                                     | 4.2 | 4.1 | 2.4 |
| AT2G18690                        | hypothetical protein                                         | 2.0                                          | 2.6 | 2.1 | -0.2 | 2.2                                     | 4.2 | 4.7 | 1.9 |
| AT2G24850                        | tyrosine aminotransferase 3                                  | 4.4                                          | 4.1 | 4.5 | 1.4  | 2.5                                     | 4.3 | 4.6 | 2.9 |
| AT2G26530                        | hypothetical protein                                         | 2.6                                          | 2.1 | 3.2 | 1.0  | 2.3                                     | 4.1 | 5.0 | 3.4 |
| AT2G26560                        | phospholipase A 2A                                           | 3.5                                          | 4.4 | 5.7 | 1.6  | 2.1                                     | 6.0 | 7.1 | 1.7 |
| AT2G29460                        | glutathione S-transferase tau 4                              | 4.0                                          | 2.8 | 5.1 | -0.1 | 5.9                                     | 6.3 | 6.5 | 3.2 |
| AT2G35980                        | protein NDR1/HIN1-like 10                                    | 3.3                                          | 2.6 | 4.2 | 0.0  | 1.4                                     | 4.8 | 5.7 | 2.6 |
| AT2G39400                        | alpha/beta-Hydrolases superfamily protein                    | 3.1                                          | 3.1 | 2.3 | 0.9  | 2.4                                     | 4.7 | 5.4 | 3.3 |
| AT2G42360                        | E3 ubiquitin-protein ligase ATL41                            | 1.8                                          | 2.9 | 2.7 | 0.8  | 1.6                                     | 4.6 | 3.6 | 1.9 |
| AT3G01420                        | alpha-dioxygenase                                            | 3.5                                          | 2.6 | 2.6 | 0.5  | 2.4                                     | 2.8 | 3.0 | 1.6 |
| AT3G04070                        | NAC domain containing protein 47                             | 4.7                                          | 3.6 | 3.2 | 0.1  | 4.1                                     | 3.6 | 4.5 | 1.5 |
| AT3G12500                        | basic chitinase B                                            | 2.3                                          | 3.0 | 4.3 | 0.6  | 1.7                                     | 4.6 | 4.3 | 1.9 |
| AT3G15500                        | ATAF-like NAC-domain transcription factor                    | 6.0                                          | 3.7 | 5.4 | -0.1 | 2.4                                     | 3.7 | 5.3 | 3.0 |
| AT3G16530                        | legume lectin-like protein                                   | 4.2                                          | 2.3 | 5.1 | 1.0  | 1.7                                     | 3.7 | 5.9 | 2.0 |
| AT3G21520                        | DUF679 domain membrane protein 1                             | 3.8                                          | 3.9 | 4.6 | 0.2  | 0.6                                     | 3.5 | 4.8 | 0.5 |
| AT3G22910                        | putative calcium-transporting ATPase 13                      | 4.8                                          | 3.9 | 3.2 | 2.3  | 2.9                                     | 3.7 | 3.1 | 3.2 |
| AT3G23250                        | myb domain protein 15                                        | 2.6                                          | 3.2 | 3.2 | 1.2  | 1.7                                     | 4.1 | 4.0 | 2.7 |
| AT3G44860                        | farnesoic acid carboxyl-O-methyltransferase                  | 4.5                                          | 4.1 | 6.0 | 1.1  | 1.2                                     | 3.9 | 4.5 | 3.4 |
| AT3G44870                        | S-adenosyl-L-methionine-dependent methyltransferase          | 3.5                                          | 2.8 | 4.0 | 1.2  | 1.9                                     | 4.2 | 4.9 | 3.1 |
| AT3G46080                        | zinc finger protein ZAT8                                     | 4.0                                          | 3.5 | 3.5 | 1.2  | 3.2                                     | 4.1 | 3.9 | 4.3 |
| AT3G47340                        | asparagine synthetase [glutamine-hydrolyzing]                | 4.9                                          | 4.0 | 4.2 | 3.1  | 3.8                                     | 4.0 | 5.0 | 1.6 |
| AT3G47480                        | putative calcium-binding protein CML47                       | 4.3                                          | 3.8 | 2.8 | 1.1  | 3.8                                     | 4.7 | 4.0 | 2.5 |
| AT3G55970                        | jasmonate-regulated protein JRG21                            | 3.3                                          | 2.5 | 3.3 | -0.1 | 2.0                                     | 3.8 | 3.4 | 1.8 |
| AT3G60120                        | beta glucosidase 27                                          | 2.2                                          | 2.5 | 4.2 | 1.1  | 1.1                                     | 4.1 | 3.6 | 2.9 |
| AT4G01360                        | BYPASS1-related protein                                      | 3.6                                          | 2.4 | 2.7 | 0.2  | 3.1                                     | 3.8 | 5.4 | 3.6 |
| AT4G01870                        | tolB-related protein                                         | 1.6                                          | 2.2 | 2.1 | 0.6  | 1.8                                     | 4.3 | 3.4 | 2.6 |
| AT4G02520                        | glutathione S-transferase F2                                 | 2.4                                          | 2.8 | 3.3 | 1.1  | 2.3                                     | 3.3 | 3.4 | 2.6 |
| AT4G11170                        | putative disease resistance protein                          | 1.6                                          | 3.6 | 2.4 | 1.2  | 0.3                                     | 3.7 | 3.3 | 1.8 |
| AT4G11650                        | osmotin-like protein OSM34                                   | 2.7                                          | 3.2 | 4.4 | 0.9  | 2.2                                     | 4.8 | 5.0 | 1.6 |
| AT4G16260                        | putative beta-1,3-endoglucanase                              | 0.7                                          | 2.3 | 6.0 | 0.8  | -0.4                                    | 5.7 | 6.0 | 2.6 |
| AT4G21840                        | methionine sulfoxide reductase B8                            | 1.9                                          | 2.7 | 3.1 | 0.5  | 1.5                                     | 3.8 | 3.6 | 1.5 |
| AT4G22690                        | cytochrome P450, family 706, subfamily A, polypeptide 1      | 2.0                                          | 2.8 | 3.6 | 1.3  | 2.1                                     | 4.3 | 4.5 | 2.1 |

|           |                                                         |     |     |     |      |     |     |     |     |
|-----------|---------------------------------------------------------|-----|-----|-----|------|-----|-----|-----|-----|
| AT4G22710 | cytochrome P450, family 706, subfamily A, polypeptide 2 | 2.0 | 2.3 | 2.8 | 1.4  | 1.7 | 3.5 | 3.5 | 1.9 |
| AT4G36430 | peroxidase 49                                           | 2.6 | 3.5 | 3.0 | 0.9  | 3.1 | 4.3 | 4.0 | 2.5 |
| AT4G37290 | hypothetical protein                                    | 3.9 | 2.8 | 4.3 | 1.8  | 1.0 | 3.6 | 4.4 | 0.8 |
| AT5G05340 | peroxidase 52                                           | 4.9 | 4.1 | 4.9 | 3.6  | 4.3 | 5.2 | 5.5 | 3.0 |
| AT5G06720 | peroxidase 53                                           | 2.7 | 2.7 | 2.7 | 0.4  | 2.3 | 3.5 | 3.6 | 1.0 |
| AT5G06730 | peroxidase 54                                           | 1.5 | 2.7 | 4.2 | 0.5  | 2.3 | 4.4 | 3.6 | 1.8 |
| AT5G13080 | putative WRKY transcription factor 75                   | 5.2 | 4.5 | 5.2 | 0.7  | 3.4 | 6.4 | 6.3 | 2.4 |
| AT5G13320 | 4-substituted benzoates-glutamate ligase GH3.12         | 2.7 | 3.1 | 2.6 | 0.6  | 3.4 | 3.8 | 3.6 | 2.9 |
| AT5G19880 | peroxidase                                              | 2.9 | 4.2 | 3.9 | 3.3  | 3.1 | 4.9 | 5.7 | 3.1 |
| AT5G22300 | bifunctional nitrilase/nitrile hydratase NIT4           | 3.4 | 2.9 | 4.6 | 1.4  | 3.6 | 4.3 | 5.2 | 3.2 |
| AT5G39100 | germin-like protein 6                                   | 2.0 | 5.5 | 5.7 | 1.6  | 2.6 | 5.7 | 3.8 | 2.6 |
| AT5G39610 | NAC-domain transcription factor                         | 3.7 | 2.4 | 2.4 | 0.4  | 3.1 | 4.6 | 5.0 | 1.7 |
| AT5G40000 | AAA-type ATPase family protein                          | 3.7 | 4.8 | 4.9 | 0.9  | 3.9 | 6.0 | 6.2 | 3.8 |
| AT5G40010 | AAA-ATPase 1                                            | 6.2 | 4.7 | 3.8 | 0.6  | 4.4 | 4.3 | 3.8 | 1.8 |
| AT5G42380 | calcium-binding protein CML37                           | 4.1 | 2.8 | 2.9 | 0.8  | 1.7 | 3.7 | 3.6 | 3.6 |
| AT5G43580 | unusual seine protease inhibitor                        | 2.5 | 2.1 | 2.7 | 0.0  | 1.8 | 3.6 | 6.0 | 0.9 |
| AT5G44400 | FAD-binding and BBE domain-containing protein           | 1.8 | 3.3 | 2.6 | 0.2  | 1.8 | 4.4 | 3.4 | 1.9 |
| AT5G49450 | basic leucine-zipper 1                                  | 4.4 | 2.9 | 4.3 | 0.8  | 1.6 | 3.6 | 4.4 | 1.9 |
| AT5G52390 | PAR1 protein                                            | 3.1 | 4.3 | 4.4 | -0.3 | 3.1 | 5.8 | 6.3 | 3.1 |
| AT5G52760 | copper transport family protein                         | 2.6 | 4.9 | 4.9 | 2.5  | 2.9 | 4.5 | 3.8 | 4.9 |

#### Specific in severe stress

|           |                                                            |      |     |     |      |     |     |     |     |
|-----------|------------------------------------------------------------|------|-----|-----|------|-----|-----|-----|-----|
| AT1G01480 | 1-aminocyclopropane-1-carboxylate synthase 2               | -1.6 | 0.6 | 1.4 | 0.1  | 0.2 | 3.2 | 4.0 | 2.1 |
| AT1G02220 | NAC domain-containing protein 3                            | 1.7  | 2.0 | 1.9 | 0.3  | 0.9 | 3.2 | 3.3 | 1.1 |
| AT1G02920 | glutathione S-transferase F7                               | -0.2 | 1.8 | 2.1 | 1.5  | 0.9 | 4.0 | 4.1 | 1.9 |
| AT1G02930 | glutathione S-transferase F6                               | 0.1  | 1.5 | 2.3 | 1.4  | 1.6 | 4.0 | 4.4 | 2.4 |
| AT1G13340 | Regulator of Vps4 activity in the MVB pathway protein      | 2.4  | 0.8 | 1.4 | 0.2  | 2.6 | 3.4 | 4.5 | 1.7 |
| AT1G13520 | hypothetical protein                                       | 2.7  | 1.8 | 1.8 | 0.4  | 1.4 | 3.0 | 3.9 | 1.8 |
| AT1G14540 | peroxidase 4                                               | 0.0  | 2.1 | 0.2 | 0.8  | 0.3 | 3.5 | 4.8 | 3.0 |
| AT1G17170 | glutathione S-transferase TAU 24                           | 1.4  | 1.2 | 0.5 | 0.3  | 3.0 | 3.8 | 4.8 | 2.2 |
| AT1G17380 | protein TIFY 11A                                           | 1.4  | 0.2 | 2.5 | 0.1  | 1.8 | 3.0 | 4.2 | 2.5 |
| AT1G18570 | myb domain protein 51                                      | 0.5  | 1.4 | 1.6 | 0.6  | 1.4 | 3.3 | 3.7 | 1.8 |
| AT1G19020 | hypothetical protein                                       | 3.4  | 2.5 | 2.1 | 0.8  | 1.3 | 3.1 | 3.5 | 1.0 |
| AT1G19180 | jasmonate-zim-domain protein 1                             | 0.8  | 0.4 | 1.7 | -0.3 | 1.4 | 2.8 | 3.5 | 1.7 |
| AT1G26380 | FAD-binding and BBE domain-containing protein              | 0.1  | 2.6 | 1.9 | 2.0  | 0.7 | 3.3 | 4.9 | 2.3 |
| AT1G26400 | FAD-binding Berberine family protein                       | 0.4  | 1.3 | 1.1 | 0.8  | 0.7 | 4.4 | 3.4 | 0.6 |
| AT1G27730 | zinc finger protein STZ/ZAT10                              | 1.1  | 1.3 | 1.3 | 0.3  | 1.3 | 3.3 | 3.5 | 2.9 |
| AT1G28190 | hypothetical protein                                       | 0.9  | 0.9 | 1.4 | 0.5  | 1.8 | 3.2 | 4.0 | 1.3 |
| AT1G28380 | protein necrotic spotted lesions 1                         | 0.7  | 0.9 | 0.9 | 0.2  | 0.4 | 2.8 | 3.1 | 1.5 |
| AT1G28480 | glutaredoxin-GRX480                                        | 2.0  | 1.8 | 2.7 | 0.5  | 2.7 | 3.5 | 3.8 | 3.6 |
| AT1G29290 | hypothetical protein                                       | 0.9  | 1.1 | 0.7 | -0.1 | 1.6 | 3.0 | 3.9 | 1.0 |
| AT1G30040 | gibberellin 2-beta-dioxygenase 2                           | 0.8  | 1.6 | 1.3 | 0.8  | 1.4 | 3.5 | 4.2 | 1.9 |
| AT1G31290 | argonaute 3                                                | 2.9  | 2.3 | 3.2 | 0.7  | 1.5 | 3.4 | 3.3 | 1.8 |
| AT1G48000 | myb domain protein 112                                     | 3.2  | 2.0 | 2.0 | -0.2 | 3.1 | 3.7 | 3.5 | 1.6 |
| AT1G55020 | lipoxygenase 1                                             | 2.2  | 0.7 | 2.3 | 0.0  | 1.8 | 4.0 | 5.1 | 1.3 |
| AT1G57990 | purine permease 18                                         | 2.5  | 1.3 | 1.1 | 0.3  | 1.8 | 2.7 | 4.0 | 1.1 |
| AT1G58420 | hypothetical protein                                       | 0.3  | 1.9 | 1.8 | 0.4  | 0.5 | 3.4 | 4.3 | 2.1 |
| AT1G60730 | probable aldo-keto reductase 5                             | 1.2  | 2.4 | 1.9 | 0.7  | 2.0 | 4.1 | 3.9 | 2.0 |
| AT1G61820 | beta glucosidase 46                                        | 2.0  | 1.0 | 2.3 | -0.3 | 1.6 | 3.0 | 5.8 | 1.3 |
| AT1G64660 | methionine gamma-lyase                                     | 1.0  | 1.0 | 1.5 | 0.2  | 0.9 | 2.8 | 4.1 | 0.2 |
| AT1G67810 | sulfur E2                                                  | 1.7  | 1.4 | 1.8 | 0.4  | 2.3 | 2.8 | 3.0 | 0.8 |
| AT1G69920 | glutathione S-transferase TAU 12                           | 0.7  | 1.6 | 1.6 | 0.7  | 2.4 | 4.2 | 4.7 | 2.4 |
| AT1G69930 | glutathione S-transferase TAU 11                           | 2.0  | 2.3 | 3.1 | 0.5  | 2.1 | 4.0 | 5.1 | 1.9 |
| AT1G74360 | putative LRR receptor-like serine/threonine-protein kinase | 0.7  | 1.2 | 1.0 | 0.5  | 0.8 | 3.3 | 4.0 | 1.3 |
| AT1G76600 | hypothetical protein                                       | 1.3  | 1.3 | 1.3 | 0.4  | 1.9 | 3.9 | 5.0 | 3.4 |
| AT1G76650 | calcium-binding protein CML38                              | 2.5  | 1.0 | 1.4 | 0.1  | 1.7 | 3.2 | 4.4 | 2.1 |
| AT1G80840 | putative WRKY transcription factor 40                      | 0.7  | 2.0 | 3.4 | 0.6  | 1.1 | 3.9 | 4.0 | 2.8 |
| AT2G22760 |                                                            | 0.9  | 0.1 | 2.9 | 0.0  | 0.8 | 2.8 | 4.9 | 2.1 |
| AT2G22860 | phytosulfokine-beta                                        | 0.6  | 1.5 | 3.8 | -0.3 | 0.6 | 4.3 | 3.8 | 2.2 |
| AT2G24180 | cytochrome P450 71B6                                       | 0.9  | 1.4 | 1.5 | 0.7  | 1.0 | 3.1 | 3.8 | 1.3 |

|           |                                                                     |      |     |     |      |      |     |     |     |
|-----------|---------------------------------------------------------------------|------|-----|-----|------|------|-----|-----|-----|
| AT2G25460 | hypothetical protein                                                | 2.2  | 1.6 | 1.7 | 0.2  | 1.9  | 3.9 | 4.1 | 2.4 |
| AT2G26380 | leucine-rich repeat-containing protein                              | 2.3  | 1.0 | 4.3 | 0.5  | 2.0  | 4.3 | 5.2 | 2.4 |
| AT2G29450 | glutathione S-transferase tau 5                                     | 2.7  | 0.5 | 1.9 | 0.7  | 2.4  | 2.9 | 4.6 | 1.8 |
| AT2G30140 | UDP-glycosyltransferase 87A2                                        | 2.1  | 1.8 | 1.0 | 0.3  | 2.4  | 3.6 | 3.9 | 1.6 |
| AT2G30750 | cytochrome P450 71A12                                               | -0.5 | 2.6 | 1.3 | 1.7  | 2.1  | 4.0 | 5.2 | 2.0 |
| AT2G32190 | hypothetical protein                                                | 3.6  | 1.7 | 1.6 | 0.4  | 2.9  | 3.0 | 4.0 | 1.6 |
| AT2G38340 | dehydration-responsive element-binding protein 2E                   | 5.7  | 1.5 | 3.1 | 0.1  | 2.8  | 3.4 | 4.1 | 1.1 |
| AT2G40000 | HS1 PRO-1 2-like protein                                            | 3.0  | 1.4 | 2.2 | 0.2  | 2.7  | 3.4 | 4.4 | 2.3 |
| AT2G41100 | calmodulin-like protein 4                                           | 1.4  | 2.3 | 1.9 | 1.4  | 2.6  | 4.2 | 4.1 | 3.2 |
| AT2G42980 | aspartyl protease-like protein                                      | -0.3 | 0.8 | 0.2 | 0.4  | 0.5  | 3.3 | 3.3 | 1.4 |
| AT2G48090 | hypothetical protein                                                | 2.2  | 1.4 | 2.4 | 0.1  | 2.3  | 3.3 | 2.9 | 1.0 |
| AT3G02840 | hypothetical protein                                                | 1.6  | 2.2 | 2.1 | 0.7  | 1.4  | 4.0 | 4.8 | 3.6 |
| AT3G04720 | pathogenesis-related 4                                              | 1.9  | 1.2 | 4.1 | 0.2  | 1.4  | 4.1 | 4.9 | 1.6 |
| AT3G06490 | putative transcription factor MYB108                                | 3.2  | 1.6 | 2.1 | -0.6 | 2.1  | 4.0 | 4.2 | 2.0 |
| AT3G13650 | disease resistance-responsive, dirigent domain-containing protein   | 1.2  | 1.5 | 1.7 | 0.1  | 2.0  | 2.9 | 4.5 | 0.9 |
| AT3G21690 | MATE efflux family protein                                          | 1.9  | 1.5 | 1.1 | 0.3  | 2.2  | 3.0 | 3.2 | 0.7 |
| AT3G22160 | VQ motif-containing protein                                         | 0.8  | 1.3 | 1.2 | 0.2  | 1.3  | 3.0 | 3.0 | 1.3 |
| AT3G26830 | protein PHYTOALEXIN DEFICIENT 3                                     | 0.8  | 1.6 | 2.7 | 0.7  | 1.4  | 4.1 | 3.6 | 2.2 |
| AT3G28210 | zinc finger (AN1-like) family protein                               | 4.3  | 2.0 | 1.8 | 0.4  | 3.4  | 3.7 | 4.4 | 1.8 |
| AT3G28580 | AAA-type ATPase family protein                                      | 0.7  | 2.5 | 1.6 | 1.2  | 1.9  | 3.7 | 3.1 | 2.6 |
| AT3G47380 | plant invertase/pectin methylesterase inhibitor superfamily protein | -1.3 | 1.7 | 1.6 | -0.5 | -1.3 | 3.6 | 3.8 | 0.7 |
| AT3G49620 | 2-oxoacid-dependent dioxygenase-like protein DIN11                  | -0.9 | 1.5 | 6.6 | 1.4  | -0.2 | 5.7 | 5.4 | 4.3 |
| AT3G53600 | C2H2-type zinc finger protein                                       | 3.5  | 1.9 | 3.4 | 0.5  | 2.3  | 5.1 | 4.6 | 3.5 |
| AT3G54150 | S-adenosyl-L-methionine-dependent methyltransferase-like protein    | 2.1  | 2.5 | 2.2 | 0.9  | 3.1  | 4.1 | 4.5 | 2.1 |
| AT3G62150 | ABC transporter B family member 21                                  | 0.6  | 0.6 | 1.3 | 0.2  | 0.6  | 2.9 | 3.0 | 0.7 |
| AT4G11280 | 1-aminocyclopropane-1-carboxylate synthase 6                        | 0.2  | 0.6 | 0.9 | -0.1 | 1.0  | 3.8 | 4.0 | 2.5 |
| AT4G15610 | hypothetical protein                                                | 1.6  | 0.9 | 0.5 | 0.1  | 1.5  | 2.6 | 3.6 | 0.6 |
| AT4G17500 | ethylene-responsive transcription factor 1A                         | 1.3  | 1.3 | 1.7 | -0.1 | 1.5  | 3.2 | 4.1 | 1.8 |
| AT4G19460 | UDP-glycosyltransferase family protein                              | -0.2 | 0.4 | 0.6 | 0.0  | 0.5  | 3.6 | 3.7 | 1.0 |
| AT4G22610 | protease inhibitor/seed storage/lipid transfer family protein       | 2.4  | 1.3 | 2.6 | -0.2 | 2.9  | 4.0 | 4.6 | 3.4 |
| AT4G24380 | hypothetical protein                                                | 0.8  | 0.3 | 0.6 | 0.3  | 1.2  | 3.2 | 3.5 | 2.0 |
| AT4G33050 | calmodulin-binding protein                                          | 1.1  | 2.3 | 1.6 | 0.9  | 1.4  | 3.2 | 4.0 | 1.6 |
| AT4G36500 | hypothetical protein                                                | 0.5  | 0.9 | 1.4 | 0.5  | 1.0  | 3.0 | 3.8 | 1.8 |
| AT4G37370 | cytochrome P450, family 81, subfamily D, polypeptide 8              | -0.8 | 1.0 | 0.4 | 0.4  | 1.4  | 4.3 | 4.3 | 3.3 |
| AT5G01380 | trihelix transcription factor GT-3a                                 | 3.3  | 2.1 | 1.9 | 0.6  | 2.9  | 4.0 | 4.6 | 3.3 |
| AT5G06320 | NDR1/HIN1-Like protein 3                                            | 3.8  | 1.6 | 1.1 | 0.3  | 2.8  | 3.4 | 4.0 | 1.8 |
| AT5G08790 | protein ATAF2                                                       | 1.4  | 1.7 | 1.3 | 0.1  | 2.3  | 3.5 | 3.8 | 2.2 |
| AT5G13220 | protein TIFY 9                                                      | 3.6  | 2.0 | 5.3 | 0.3  | 0.7  | 2.7 | 3.4 | 1.8 |
| AT5G19110 | Eukaryotic aspartyl protease family protein                         | 1.3  | 0.4 | 3.0 | 0.1  | 1.3  | 2.9 | 4.5 | 2.7 |
| AT5G24140 | squalene monooxygenase 2                                            | 1.0  | 1.0 | 2.1 | 0.2  | 2.2  | 3.1 | 4.1 | 2.0 |
| AT5G26340 | sugar transport protein 13                                          | 2.3  | 1.3 | 2.8 | 0.6  | 2.3  | 2.9 | 4.5 | 1.6 |
| AT5G28510 | beta glucosidase 24                                                 | 1.8  | 0.7 | 4.1 | -1.1 | 1.8  | 4.4 | 5.3 | 1.9 |
| AT5G35735 | putative auxin-responsive protein                                   | 1.1  | 1.4 | 2.3 | 0.2  | 1.2  | 4.1 | 4.3 | 1.8 |
| AT5G36970 | NDR1/HIN1-like 25                                                   | 3.7  | 2.1 | 3.5 | 1.3  | 0.7  | 3.2 | 4.0 | 0.5 |
| AT5G39580 | peroxidase 62                                                       | 1.5  | 2.6 | 1.4 | 0.2  | 1.3  | 3.3 | 5.3 | 2.8 |
| AT5G39670 | putative calcium-binding protein CML45                              | 2.6  | 2.8 | 1.6 | 1.2  | 3.1  | 3.9 | 3.3 | 2.3 |
| AT5G44620 | cytochrome P450, family 706, subfamily A, polypeptide 3             | 1.3  | 1.5 | 2.2 | 0.8  | 1.2  | 3.5 | 3.7 | 1.5 |
| AT5G46350 | putative WRKY transcription factor 8                                | 3.3  | 1.3 | 3.0 | 0.7  | 1.4  | 3.1 | 3.7 | 2.5 |
| AT5G47070 | protein kinase family protein                                       | 0.8  | 1.2 | 0.8 | 0.3  | 1.6  | 3.4 | 3.4 | 1.6 |
| AT5G49620 | myb domain protein 78                                               | 3.5  | 1.4 | 2.7 | -1.0 | 1.9  | 3.6 | 4.2 | 0.3 |
| AT5G49690 | UDP-glycosyltransferase 91C1                                        | 2.9  | 1.8 | 1.6 | 0.0  | 1.0  | 2.7 | 3.6 | 0.3 |
| AT5G57220 | cytochrome P450, family 81, subfamily F, polypeptide 2              | -0.7 | 1.1 | 0.6 | 1.5  | 0.2  | 3.5 | 3.8 | 2.7 |
| AT5G59490 | haloacid dehalogenase-like hydrolase (HAD) superfamily protein      | 2.7  | 1.7 | 1.5 | 0.4  | 3.2  | 3.2 | 4.0 | 1.9 |

|                         |                                                                                 |      |     |     |      |      |      |      |      |
|-------------------------|---------------------------------------------------------------------------------|------|-----|-----|------|------|------|------|------|
| AT5G64750               | ethylene-responsive transcription factor<br>ABR1                                | 1.8  | 0.7 | 0.5 | 0.2  | 1.9  | 2.9  | 3.1  | 1.5  |
| AT5G65600               | concanavalin A-like lectin kinase-like<br>protein                               | 1.3  | 2.0 | 2.1 | 1.4  | 0.5  | 3.4  | 3.1  | 1.5  |
| AT5G67340               | ARM repeat superfamily protein                                                  | 1.6  | 2.5 | 1.8 | 0.4  | 2.2  | 4.2  | 3.9  | 1.6  |
| specific in mild stress |                                                                                 |      |     |     |      |      |      |      |      |
| AT1G04370               | ethylene-responsive transcription factor<br>14                                  | 1.8  | 2.1 | 5.1 | -1.0 | -0.1 | 2.6  | 1.6  | 0.6  |
| AT1G06520               | sn-glycerol-3-phosphate 2-O-<br>acyltransferase                                 | 2.6  | 4.1 | 4.6 | 0.0  | 0.6  | 3.9  | 3.1  | 0.3  |
| AT1G07900               | LOB domain-containing protein 1                                                 | 2.7  | 4.2 | 3.5 | 0.6  | 0.9  | 1.2  | 0.4  | 0.4  |
| AT1G08050               | C3HC4-type RING finger-containing<br>protein                                    | 1.5  | 2.3 | 2.2 | 0.7  | 0.5  | 1.9  | 2.1  | 0.5  |
| AT1G08080               | alpha carbonic anhydrase 7                                                      | 3.0  | 3.1 | 3.6 | 0.4  | 0.6  | 3.9  | 2.8  | 2.4  |
| AT1G08100               | nitrate transporter 2.2                                                         | 1.4  | 4.1 | 3.1 | 0.8  | 1.3  | 3.5  | 0.5  | 0.9  |
| AT1G08430               | aluminum-activated malate transporter 1                                         | 6.5  | 3.8 | 3.4 | 1.3  | 6.3  | -0.3 | 0.3  | 1.1  |
| AT1G08630               | threonine aldolase                                                              | 0.4  | 2.7 | 4.2 | 1.0  | -0.4 | 1.2  | 5.3  | 0.1  |
| AT1G09935               | phosphoglycerate mutase-like protein                                            | 0.9  | 2.4 | 3.7 | 0.0  | 0.0  | 1.9  | 0.5  | 1.0  |
| AT1G11330               | G-type lectin S-receptor-like<br>serine/threonine-protein kinase                | 1.6  | 2.2 | 2.4 | 0.0  | 1.5  | 2.9  | 1.1  | 1.0  |
| AT1G15610               | hypothetical protein                                                            | 4.4  | 5.2 | 4.5 | 0.7  | 0.3  | 0.4  | 0.1  | -0.1 |
| AT1G15620               |                                                                                 | 1.1  | 3.3 | 2.9 | 0.9  | 0.2  | 2.3  | 1.4  | -0.2 |
| AT1G17420               | lipoxygenase 3                                                                  | 2.6  | 2.6 | 4.1 | 0.4  | 0.5  | 2.2  | 5.3  | 2.4  |
| AT1G18970               | germin-like protein 4                                                           | 1.9  | 3.8 | 3.6 | 1.1  | 1.0  | 3.3  | 2.8  | 1.7  |
| AT1G18980               | germin-like protein subfamily T member<br>2                                     | 2.7  | 3.0 | 2.6 | 0.6  | 1.4  | 3.1  | 2.5  | 1.3  |
| AT1G19960               | hypothetical protein                                                            | 2.9  | 3.5 | 3.3 | 0.7  | 3.3  | 2.4  | 3.8  | 1.4  |
| AT1G20180               | hypothetical protein                                                            | 5.5  | 2.5 | 5.2 | 0.3  | 0.3  | 0.5  | 0.8  | 0.0  |
| AT1G20310               | hypothetical protein                                                            | 3.8  | 2.4 | 4.3 | 0.7  | 1.4  | 2.9  | 3.0  | 4.2  |
| AT1G21240               | wall-associated receptor kinase 3                                               | 0.1  | 4.1 | 3.8 | -0.7 | 0.7  | 3.1  | 0.7  | -0.4 |
| AT1G21400               | thiamin diphosphate-binding fold protein                                        | 5.1  | 3.9 | 4.8 | 1.1  | 1.8  | 2.5  | 5.5  | 0.9  |
| AT1G23730               | beta carbonic anhydrase 3                                                       | 1.3  | 4.5 | 3.7 | -0.3 | -0.6 | 2.2  | 0.7  | 0.0  |
| AT1G23840               | hypothetical protein                                                            | 1.5  | 3.0 | 2.5 | 0.0  | 0.4  | 3.3  | 0.5  | 0.3  |
| AT1G26390               | FAD-binding Berberine family protein                                            | 2.0  | 4.1 | 3.2 | 1.0  | 0.9  | 2.7  | 3.5  | -0.2 |
| AT1G26410               | FAD-binding and BBE domain-<br>containing protein                               | 1.6  | 2.6 | 2.1 | 2.5  | 0.0  | 1.5  | 1.4  | 1.2  |
| AT1G29860               | putative WRKY transcription factor 71                                           | 2.1  | 3.1 | 2.3 | 1.2  | 1.0  | 3.9  | 1.6  | 1.9  |
| AT1G30100               | 9-cis-epoxycarotenoid dioxygenase                                               | 0.8  | 2.4 | 2.4 | -0.7 | 0.9  | 2.7  | 0.4  | 0.8  |
| AT1G35210               | hypothetical protein                                                            | 1.8  | 2.4 | 2.6 | 1.1  | 0.6  | 2.9  | 2.5  | 1.5  |
| AT1G35513               |                                                                                 | 2.1  | 3.0 | 2.2 | 1.2  | 3.4  | 3.1  | 0.7  | 2.8  |
| AT1G44010               | hypothetical protein                                                            | -2.3 | 3.3 | 3.4 | 0.3  | -1.2 | 0.9  | -0.2 | -0.3 |
| AT1G47890               | receptor like protein 7                                                         | 2.8  | 3.1 | 2.6 | 1.1  | 1.8  | 4.4  | 2.1  | 0.1  |
| AT1G52100               | jacalin-like lectin domain-containing<br>protein                                | 1.3  | 3.2 | 2.9 | 0.0  | 0.0  | 2.2  | 2.2  | 0.4  |
| AT1G52130               | mannose-binding lectin-like protein                                             | 2.5  | 3.7 | 3.6 | 0.2  | 3.2  | 3.5  | 0.9  | 0.2  |
| AT1G52890               | NAC domain-containing protein 19                                                | 5.5  | 3.8 | 4.8 | 0.5  | 1.8  | 2.9  | 4.2  | 0.7  |
| AT1G55230               | hypothetical protein                                                            | 6.0  | 5.3 | 5.5 | 2.3  | 3.8  | 3.5  | 1.2  | 0.9  |
| AT1G58300               | heme oxygenase 4                                                                | 4.3  | 5.2 | 3.6 | 1.6  | 1.6  | 0.3  | 0.8  | -0.1 |
| AT1G61810               | beta-glucosidase 45                                                             | 1.1  | 2.4 | 3.2 | 0.0  | 0.2  | 0.7  | 3.4  | 0.2  |
| AT1G65500               | hypothetical protein                                                            | 0.4  | 4.0 | 4.6 | 1.0  | 0.0  | 3.3  | 0.2  | 0.7  |
| AT1G67980               | caffeoyl-CoA 3-O-methyltransferase                                              | 3.1  | 2.5 | 3.2 | 1.3  | 0.9  | 3.0  | 4.8  | 1.4  |
| AT1G70260               | nodulin MtN21-like transporter<br>UMAMIT36                                      | 2.5  | 3.9 | 3.5 | 2.2  | 0.1  | -0.3 | -0.3 | 0.3  |
| AT1G73220               | organic cation/carnitine transporter1                                           | 7.6  | 5.0 | 4.8 | 0.4  | 4.5  | -0.7 | -1.5 | -1.1 |
| AT1G73800               | protein SAR Deficient 1                                                         | 1.0  | 2.8 | 2.4 | 1.3  | 1.4  | 2.7  | 1.8  | 3.7  |
| AT1G73805               | protein SAR Deficient 1                                                         | 2.5  | 3.8 | 3.2 | 1.8  | 0.1  | 0.6  | 0.4  | 0.8  |
| AT1G73810               | core-2/I-branching beta-1,6-N-<br>acetylglucosaminyltransferase-like<br>protein | 4.9  | 3.4 | 2.5 | 1.1  | 0.6  | 2.0  | 0.7  | 0.2  |
| AT1G74140               | Rhomboid-related intramembrane serine<br>protease family protein                | 1.9  | 3.9 | 3.1 | -0.5 | 0.7  | 0.2  | 0.8  | -0.7 |
| AT1G74190               | receptor like protein 15                                                        | 1.5  | 2.6 | 2.9 | 0.2  | -0.1 | 0.4  | 0.1  | -0.1 |
| AT1G74710               | Isochorismate synthase 1                                                        | 2.4  | 3.1 | 2.2 | 0.7  | 3.8  | 3.7  | 1.5  | 2.9  |
| AT1G76430               | putative inorganic phosphate transporter<br>1-9                                 | 1.3  | 3.6 | 3.1 | 0.9  | -0.5 | 0.6  | 0.8  | 0.4  |
| AT1G80160               | GLYOXYLASE I 7                                                                  | 4.8  | 2.6 | 4.6 | 0.7  | 1.0  | 1.5  | 4.4  | 0.2  |

|           |                                                                      |      |     |     |      |      |      |      |      |
|-----------|----------------------------------------------------------------------|------|-----|-----|------|------|------|------|------|
| AT1G80590 | putative WRKY transcription factor 66                                | 2.1  | 3.3 | 4.9 | 0.4  | 0.3  | 1.4  | 0.8  | 0.0  |
| AT2G02010 | glutamate decarboxylase 4                                            | 2.1  | 2.9 | 3.7 | 0.9  | 0.8  | 2.4  | 3.3  | 1.8  |
| AT2G02250 | phloem protein 2-B2                                                  | 3.8  | 3.4 | 2.8 | 0.4  | 2.5  | 2.2  | 1.0  | 0.7  |
| AT2G17040 | NAC transcription factor family protein<br>NAC036                    | 1.0  | 3.1 | 3.0 | 0.6  | 1.0  | 5.3  | 1.1  | 2.3  |
| AT2G18660 | plant natriuretic peptide A                                          | 1.7  | 4.8 | 4.9 | 2.3  | 1.4  | 4.2  | 0.2  | 2.0  |
| AT2G25510 | hypothetical protein                                                 | 1.2  | 5.4 | 4.3 | 0.6  | 0.1  | -0.2 | 0.5  | -0.1 |
| AT2G28270 | cysteine/histidine-rich C1-like domain-<br>containing protein        | 3.8  | 4.1 | 3.4 | 0.6  | -0.6 | -0.2 | -0.9 | 1.2  |
| AT2G29150 | tropinone reductase-like protein                                     | 0.4  | 2.8 | 3.9 | 0.1  | 0.0  | 2.6  | 1.3  | 0.3  |
| AT2G29470 | glutathione S-transferase tau 3                                      | 4.1  | 3.1 | 4.7 | -0.2 | 2.1  | 1.9  | 3.3  | -1.0 |
| AT2G30670 | NAD(P)-binding Rossmann-fold<br>superfamily protein                  | 1.4  | 4.6 | 3.4 | -1.9 | 1.5  | 2.0  | 1.1  | -0.1 |
| AT2G32130 | hypothetical protein                                                 | 2.8  | 2.2 | 2.2 | 0.7  | 1.2  | 0.8  | 2.7  | 0.9  |
| AT2G32140 | transmembrane receptor protein                                       | 3.6  | 2.8 | 2.7 | 1.1  | 2.6  | 3.5  | 5.4  | 2.5  |
| AT2G34580 | hypothetical protein                                                 | 1.5  | 2.6 | 4.0 | 0.7  | -0.1 | 0.5  | 0.3  | 0.0  |
| AT2G38240 | 2-oxoglutarate (2OG) and Fe(II)-<br>dependent oxygenase-like protein | 5.1  | 3.4 | 4.0 | 1.0  | 1.8  | 3.8  | 5.4  | 1.4  |
| AT2G43510 | trypsin inhibitor protein 1                                          | 5.8  | 4.0 | 4.3 | 2.1  | 3.7  | 3.1  | 5.4  | 1.8  |
| AT2G43580 | chitinase family protein                                             | 4.4  | 2.3 | 3.7 | 0.2  | 1.2  | 0.4  | 0.8  | 1.1  |
| AT2G43590 | chitinase family protein                                             | 4.3  | 2.4 | 3.5 | 0.5  | 1.8  | 0.9  | 1.3  | 2.0  |
| AT2G44460 | beta glucosidase 28                                                  | 1.9  | 5.8 | 2.6 | 0.2  | 0.1  | 3.0  | 0.8  | 0.1  |
| AT2G44840 | ethylene-responsive transcription factor<br>13                       | 2.5  | 2.8 | 3.4 | 1.1  | 0.8  | 2.4  | 1.7  | 3.8  |
| AT2G46400 | putative WRKY transcription factor 46                                | 2.5  | 2.2 | 2.3 | 0.5  | 1.2  | 1.0  | 1.3  | 1.7  |
| AT3G03670 | peroxidase                                                           | 0.1  | 2.9 | 3.0 | 0.4  | -1.7 | 1.8  | 3.0  | 1.8  |
| AT3G04210 | TIR-NBS class disease resistance protein                             | 3.1  | 2.5 | 5.2 | 0.6  | 0.1  | 2.6  | 0.8  | 0.4  |
| AT3G10930 | hypothetical protein                                                 | 2.5  | 2.7 | 2.9 | 0.6  | 1.5  | 4.5  | 3.4  | 3.1  |
| AT3G12230 | serine carboxypeptidase-like 14                                      | 4.1  | 5.4 | 5.4 | 1.9  | 3.1  | 1.9  | 1.6  | -0.2 |
| AT3G13950 | hypothetical protein                                                 | 3.8  | 3.6 | 2.7 | 1.3  | 0.3  | 0.5  | 0.3  | 0.1  |
| AT3G23120 | receptor like protein 38                                             | 0.4  | 3.9 | 3.1 | -0.1 | 0.5  | 3.7  | 0.9  | 0.6  |
| AT3G23240 | ethylene-responsive transcription factor<br>1B                       | 1.6  | 2.6 | 4.0 | -0.8 | 0.3  | 3.3  | 2.1  | 0.5  |
| AT3G26220 | cytochrome P450 71B3                                                 | 5.2  | 2.6 | 3.7 | 0.1  | 1.5  | 2.6  | 3.1  | 0.1  |
| AT3G28510 | AAA-type ATPase family protein                                       | 4.9  | 5.7 | 5.1 | 3.6  | 4.3  | 4.2  | 0.9  | 1.5  |
| AT3G46090 | zinc finger protein ZAT7                                             | 3.9  | 3.2 | 2.7 | 0.7  | 2.0  | 3.0  | 3.0  | 2.7  |
| AT3G48580 | probable xyloglucan<br>endotransglucosylase/hydrolase 11             | 6.2  | 4.1 | 4.7 | -1.3 | 2.8  | 2.8  | 3.2  | 0.4  |
| AT3G48850 | phosphate transporter 3;2                                            | 2.8  | 3.0 | 2.6 | 1.7  | 0.7  | 3.0  | 2.3  | 1.1  |
| AT3G49120 | peroxidase 34                                                        | 3.2  | 2.2 | 2.1 | 1.2  | 2.2  | 2.5  | 3.1  | 1.4  |
| AT3G52780 | putative purple acid phosphatase 20                                  | 5.8  | 4.7 | 4.0 | 0.2  | 1.5  | 3.0  | 1.2  | 0.4  |
| AT3G53770 | late embryogenesis abundant 3 (LEA3)<br>family protein               | 2.4  | 4.2 | 3.2 | 0.3  | -0.9 | 1.0  | 0.0  | 0.1  |
| AT3G53820 | C2H2 and C2HC zinc fingers<br>superfamily protein                    | 1.2  | 2.7 | 3.1 | 0.0  | 0.6  | 3.3  | 3.1  | 0.6  |
| AT3G55090 | ABC transporter G family member 16                                   | 2.1  | 2.6 | 2.2 | 0.7  | 0.4  | 0.2  | 1.0  | 0.3  |
| AT3G56710 | sigma factor binding protein 1                                       | 0.3  | 2.5 | 3.0 | 0.0  | 0.0  | 1.6  | 0.5  | 0.8  |
| AT3G60140 | beta-glucosidase 30                                                  | 5.9  | 4.3 | 4.7 | 0.8  | 1.0  | 1.9  | 3.9  | 0.1  |
| AT4G04570 | cysteine-rich receptor-like protein kinase<br>40                     | 1.7  | 2.7 | 2.2 | 0.9  | 0.2  | 2.8  | 1.4  | 0.4  |
| AT4G10500 | oxidoreductase, 2OG-Fe(II) oxygenase<br>family protein               | 1.4  | 4.0 | 3.5 | 0.7  | 1.8  | 3.6  | 2.4  | 1.4  |
| AT4G11290 | peroxidase 39                                                        | 0.1  | 2.2 | 2.6 | -0.3 | 0.1  | 3.4  | 2.0  | -0.2 |
| AT4G11340 | TIR-NBS-LRR class disease resistance<br>protein                      | 2.8  | 5.2 | 4.6 | 0.7  | 0.7  | 2.6  | 0.9  | 1.7  |
| AT4G11470 | putative cysteine-rich receptor-like<br>protein kinase 31            | 1.2  | 2.1 | 3.0 | 0.0  | 0.2  | 2.0  | 1.2  | 0.5  |
| AT4G12290 | copper amine oxidase family protein                                  | 3.3  | 2.7 | 2.6 | 0.7  | 1.3  | 1.6  | 1.0  | 0.2  |
| AT4G12470 | azelaic acid induced 1                                               | -0.3 | 3.1 | 2.6 | -0.5 | 0.2  | 0.5  | 0.8  | 0.0  |
| AT4G13420 | potassium transporter 5                                              | 3.9  | 3.4 | 2.9 | -0.2 | 2.6  | -1.1 | 0.8  | 4.0  |
| AT4G13890 | serine hydroxymethyltransferase 5                                    | 1.5  | 3.2 | 2.6 | 0.3  | 1.2  | 2.0  | 0.6  | -0.1 |
| AT4G15100 | serine carboxypeptidase-like 30                                      | 3.5  | 2.4 | 5.5 | 0.6  | 0.2  | 0.8  | 2.7  | 0.4  |
| AT4G17660 | protein kinase family protein                                        | 2.9  | 4.1 | 3.8 | 0.5  | 0.6  | 2.6  | 0.6  | 0.4  |
| AT4G19750 | Glycosyl hydrolase family protein with<br>chitinase insertion domain | 5.2  | 5.2 | 5.4 | -0.2 | 0.6  | 1.9  | 1.1  | -0.9 |
| AT4G19760 | Glycosyl hydrolase family protein with<br>chitinase insertion domain | 3.6  | 4.3 | 4.7 | 0.4  | 0.5  | 1.6  | 0.5  | -0.6 |

|           |                                                                      |      |     |     |      |      |      |      |      |
|-----------|----------------------------------------------------------------------|------|-----|-----|------|------|------|------|------|
| AT4G19800 | Glycosyl hydrolase family protein with chitinase insertion domain    | 2.8  | 3.0 | 3.4 | -0.7 | -0.8 | -1.5 | -0.9 | -2.1 |
| AT4G21380 | receptor kinase 3                                                    | 1.2  | 4.8 | 2.3 | 1.6  | 1.2  | 5.2  | 3.4  | 2.0  |
| AT4G21680 | nitrate transporter 1.8                                              | -0.4 | 2.8 | 3.6 | 0.2  | -0.1 | 4.4  | 3.3  | 0.6  |
| AT4G22020 |                                                                      | 1.1  | 2.8 | 3.1 | -0.2 | 0.2  | 4.7  | 3.8  | 1.1  |
| AT4G23990 | cellulose synthase-like protein G3                                   | -0.3 | 4.4 | 3.4 | 0.1  | -0.1 | 0.2  | 0.1  | 0.0  |
| AT4G25780 | putative pathogenesis-related protein                                | 0.0  | 3.4 | 6.6 | 0.3  | -0.8 | 3.2  | 4.0  | -1.5 |
| AT4G27850 | glycine-rich family protein                                          | 2.9  | 4.2 | 3.3 | 0.1  | 1.2  | 2.3  | 0.1  | -0.5 |
| AT4G29050 | Concanavalin A-like lectin protein kinase family protein             | 2.0  | 2.8 | 2.4 | 1.1  | 1.5  | 2.6  | 2.3  | 1.8  |
|           | xyloglucan                                                           |      |     |     |      |      |      |      |      |
| AT4G30270 | endotransglucosylase/hydrolase protein 24                            | 5.7  | 2.4 | 2.4 | 0.7  | 3.7  | 2.2  | 4.0  | 0.6  |
| AT4G30430 | tetraspanin9                                                         | 4.9  | 3.3 | 3.5 | 0.8  | 0.8  | 1.8  | 2.7  | 1.1  |
| AT4G31370 | FASCICLIN-like arabinogalactan protein 5                             | 3.2  | 2.5 | 3.3 | 0.2  | 0.0  | 0.4  | 0.1  | 0.1  |
| AT4G32950 | putative protein phosphatase 2C 61                                   | 3.9  | 3.4 | 2.7 | 0.8  | 1.4  | 1.9  | 2.2  | 0.8  |
| AT4G33720 | putative pathogenesis-related protein                                | -1.1 | 3.5 | 6.5 | -0.5 | -1.7 | 2.8  | 3.3  | -2.4 |
| AT4G35180 | LYS/HIS transporter 7                                                | 1.3  | 3.6 | 3.1 | 1.5  | 0.4  | 1.7  | 1.4  | 0.7  |
| AT4G35190 | cytokinin riboside 5'-monophosphate phosphoribohydrolase LOG5        | 2.4  | 3.8 | 3.1 | -0.8 | 3.6  | 4.2  | 3.2  | 1.1  |
| AT4G35770 | senescence-associated protein DIN1                                   | 3.9  | 3.0 | 4.1 | 3.1  | 1.6  | 1.1  | 4.7  | 0.8  |
| AT4G36880 | cysteine proteinase1                                                 | 4.8  | 2.8 | 4.4 | 1.8  | 2.4  | 0.5  | 1.2  | 1.0  |
| AT4G37430 | cytochrome P450 81F1                                                 | 1.5  | 2.8 | 2.5 | 0.3  | 1.4  | 2.3  | -0.1 | 0.7  |
| AT4G37780 | myb domain protein 87                                                | 0.1  | 2.8 | 2.5 | 0.2  | -0.1 | 3.6  | 1.7  | 2.1  |
| AT4G37990 | cinnamyl alcohol dehydrogenase 8                                     | 3.5  | 2.7 | 2.7 | -0.5 | 1.5  | 2.5  | 6.3  | 1.7  |
| AT5G05390 | laccase 12                                                           | 2.4  | 3.2 | 2.8 | 1.2  | 0.2  | 0.0  | 0.9  | 0.4  |
| AT5G06760 | late embryogenesis abundant protein 4-5                              | 5.2  | 4.1 | 3.2 | -0.2 | 3.9  | 2.4  | 1.4  | 3.1  |
| AT5G07570 | glycine/proline-rich protein                                         | 3.8  | 3.6 | 3.8 | 0.6  | 0.3  | -0.4 | 0.8  | 0.1  |
| AT5G14760 | L-aspartate oxidase                                                  | 2.2  | 3.1 | 2.2 | 0.0  | 2.8  | 2.7  | 1.0  | 0.5  |
| AT5G22380 | NAC domain-containing protein                                        | 0.5  | 4.3 | 4.6 | 0.6  | -0.2 | 1.4  | 0.7  | 1.9  |
| AT5G22520 | hypothetical protein                                                 | 2.4  | 3.7 | 3.2 | 2.2  | 1.7  | 3.5  | 2.1  | 2.8  |
| AT5G22530 | hypothetical protein                                                 | 2.6  | 4.2 | 4.3 | 2.1  | 1.9  | 4.1  | 1.9  | 2.6  |
| AT5G22570 | putative WRKY transcription factor 38                                | 2.9  | 3.3 | 3.3 | 1.6  | 1.8  | 2.3  | 1.0  | 1.5  |
| AT5G24550 | beta glucosidase 32                                                  | 2.3  | 2.4 | 2.9 | 0.5  | 0.7  | 0.9  | 1.2  | 1.4  |
| AT5G26170 | putative WRKY transcription factor 50                                | 4.6  | 4.6 | 3.9 | 0.6  | 2.2  | 4.3  | 0.3  | 1.2  |
| AT5G38200 | class I glutamine amidotransferase-like protein                      | 3.6  | 2.6 | 2.5 | 0.9  | 4.2  | 1.0  | 2.2  | 0.9  |
| AT5G38900 | Thioredoxin superfamily protein                                      | 2.3  | 3.2 | 2.6 | 1.0  | 1.9  | 3.4  | 2.8  | 1.9  |
| AT5G38910 | putative germin-like protein subfamily 1 member 9                    | 7.2  | 7.1 | 7.1 | 1.0  | 4.4  | 4.5  | 1.5  | 0.4  |
| AT5G39110 | germin-like protein subfamily 1 member 14                            | 0.1  | 4.9 | 5.6 | 1.1  | 0.0  | 3.0  | 0.8  | 0.6  |
| AT5G39120 | germin-like protein subfamily 1 member 15                            | 0.6  | 4.8 | 5.8 | 0.5  | 0.0  | 1.6  | 0.1  | 0.1  |
| AT5G39130 | germin-like protein subfamily 1 member 16                            | 1.1  | 3.5 | 4.4 | 0.6  | 0.2  | 1.3  | 0.4  | 0.5  |
| AT5G39150 | germin-like protein subfamily 1 member 17                            | 0.7  | 5.7 | 6.6 | 1.2  | 1.1  | 5.3  | 2.4  | 2.1  |
| AT5G39160 | germin-like protein subfamily 1 member 18                            | 1.2  | 3.4 | 4.2 | 0.4  | 0.2  | 1.4  | 0.2  | 0.6  |
| AT5G39180 | germin-like protein subfamily 1 member 19                            | 0.6  | 5.0 | 5.5 | 1.1  | 1.1  | 5.0  | 2.1  | 2.0  |
| AT5G39190 | germin-like protein 2a                                               | 1.2  | 3.4 | 4.1 | 0.4  | 0.3  | 1.7  | 0.2  | 0.6  |
| AT5G40990 | GDSL lipase 1                                                        | 1.0  | 3.2 | 3.9 | 2.8  | 0.5  | 2.9  | 2.1  | 2.6  |
| AT5G43650 | transcription factor bHLH92                                          | 3.9  | 2.8 | 3.6 | 1.3  | 1.1  | 2.2  | 2.1  | 3.6  |
| AT5G46950 | invertase/pectin methylesterase inhibitor family protein             | 0.4  | 2.3 | 2.9 | -0.1 | 0.2  | 1.1  | 1.1  | -0.4 |
| AT5G47220 | ethylene-responsive transcription factor 2                           | 3.0  | 3.1 | 3.8 | 0.4  | 0.8  | 2.6  | 1.9  | 1.7  |
| AT5G60770 | nitrate transporter 2.4                                              | 1.6  | 3.1 | 2.9 | 0.0  | 0.1  | -0.3 | -0.5 | 0.3  |
| AT5G64810 | putative WRKY transcription factor 51                                | 2.1  | 3.2 | 2.5 | 1.0  | 2.2  | 2.4  | 1.1  | 1.2  |
| AT5G64870 | SPFH/Band 7/PHB domain-containing membrane-associated protein family | 1.9  | 3.0 | 2.6 | 0.5  | -0.1 | -0.6 | 0.7  | 0.2  |
| AT5G66670 | hypothetical protein                                                 | 2.3  | 2.5 | 2.2 | 0.4  | 1.8  | 2.2  | 0.3  | 0.6  |

Averaged values of fold change in three microarray replicates were shown.
