# Supplementary material
Source: publisher figshare collection journal article supplement (https://tandf.figshare.com/articles/dataset/_/6741470)
Supplement: Supplementary file 3 [file 1]

Archive with 14 entries (14 files):
- tssp_a_1454253_sm3297.pdf
- tssp_a_1454253_sm3296.pdf
- tssp_a_1454253_sm3294.pdf
- tssp_a_1454253_sm3293.pdf
- tssp_a_1454253_sm3292.pdf
- tssp_a_1454253_sm3291.pdf
- tssp_a_1454253_sm3290.pdf
- tssp_a_1454253_sm3289.pdf
- tssp_a_1454253_sm3288.pdf
- tssp_a_1454253_sm3287.jpg
- tssp_a_1454253_sm3286.jpg
- tssp_a_1454253_sm3284.jpg
- tssp_a_1454253_sm3282.jpg
- tssp_a_1454253_sm3276.jpg
