# Supplementary material
Source: publisher figshare collection journal article supplement (https://tandf.figshare.com/articles/dataset/_/6741470)
Supplement: Supplementary file 3 [file 1 › tssp_a_1454253_sm3288.pdf]

**Supplementary Table S1. Specifically expressed genes under mild Al stress**

| Gene ID   | Description                                              | Average log <sub>2</sub> FC value under mild |      |      |      | Average log <sub>2</sub> FC value under |      |      |      |
|-----------|----------------------------------------------------------|----------------------------------------------|------|------|------|-----------------------------------------|------|------|------|
|           |                                                          | Al                                           | Cd   | Cu   | Na   | Al                                      | Cd   | Cu   | Na   |
| AT1G02310 | mannan endo-1,4-beta-mannosidase 1                       | 2.7                                          | 0.5  | 0.6  | 0.3  | 2.0                                     | 2.7  | 4.1  | 1.0  |
| AT1G02470 | SRPBCC ligand-binding domain-containing protein          | 2.5                                          | 0.1  | -0.2 | -0.4 | 0.6                                     | 0.7  | 1.1  | -0.1 |
| AT1G03170 | protein FANTASTIC FOUR 2                                 | 3.7                                          | 1.5  | 1.6  | 0.3  | 1.0                                     | 1.1  | 0.5  | 0.7  |
| AT1G05340 | hypothetical protein                                     | 3.4                                          | 0.7  | 0.9  | -0.2 | 1.8                                     | 1.3  | 2.4  | 0.8  |
| AT1G10540 | nucleobase-ascorbate transporter 8                       | 2.4                                          | 0.6  | 0.0  | 0.2  | 0.2                                     | 0.4  | 0.6  | 0.3  |
| AT1G11190 | endonuclease 1                                           | 2.8                                          | 0.3  | 0.6  | 0.0  | 2.0                                     | 0.7  | 1.7  | 0.3  |
| AT1G13310 | Endosomal targeting BRO1-like domain-containing protein  | 2.3                                          | 0.7  | -1.1 | 0.4  | 0.8                                     | 0.9  | 0.1  | 0.9  |
| AT1G13340 | Regulator of Vps4 activity in the MVB pathway protein    | 2.4                                          | 0.8  | 1.4  | 0.2  | 2.6                                     | 3.4  | 4.5  | 1.7  |
| AT1G13520 | hypothetical protein                                     | 2.7                                          | 1.8  | 1.8  | 0.4  | 1.4                                     | 3.0  | 3.9  | 1.8  |
| AT1G13890 | N-ethylmaleimide-sensitive factor adaptor protein 30     | 2.5                                          | -0.1 | -0.4 | -0.2 | 0.5                                     | 0.3  | 0.5  | 0.2  |
| AT1G15180 | MATE efflux family protein                               | 2.9                                          | -1.0 | -0.5 | 0.0  | 0.6                                     | -0.5 | 0.2  | -0.1 |
| AT1G17310 | MADS-box transcription factor family protein             | 3.4                                          | 1.2  | 1.7  | -1.4 | 1.9                                     | 2.7  | 3.2  | -0.6 |
| AT1G17710 | phosphoethanolamine/phosphocholine phosphatase           | 5.5                                          | 1.6  | 1.7  | 0.5  | 0.6                                     | 0.3  | 0.5  | 0.0  |
| AT1G19610 | defensin-like protein 19                                 | 4.2                                          | 0.7  | 1.5  | 0.7  | -0.1                                    | -0.3 | 1.4  | 0.1  |
| AT1G20350 | translocase inner membrane subunit 17-1                  | 3.4                                          | 0.8  | 2.4  | -0.5 | 0.2                                     | 0.6  | 0.6  | 0.5  |
| AT1G21890 | WAT1-related protein                                     | 3.1                                          | 1.7  | 0.1  | -0.4 | 1.2                                     | 0.7  | -0.3 | 0.2  |
| AT1G23550 | probable inactive poly [ADP-ribose] polymerase SRO2      | 2.7                                          | 0.4  | 0.5  | 0.2  | 2.3                                     | 2.0  | 2.8  | 0.6  |
| AT1G25400 | hypothetical protein                                     | 2.9                                          | 1.5  | 2.1  | 0.5  | 0.5                                     | 1.6  | 1.8  | 0.5  |
| AT1G26560 | beta glucosidase 40                                      | 2.3                                          | 0.7  | 1.2  | 0.3  | 0.0                                     | 0.5  | 0.1  | 0.1  |
| AT1G27940 | ABC transporter B family member 13                       | 2.7                                          | -2.1 | -1.3 | 0.3  | -0.1                                    | -0.7 | 0.1  | 0.4  |
| AT1G30220 | putative inositol transporter 2                          | 4.2                                          | 0.2  | 0.1  | 0.4  | 0.5                                     | 0.4  | 1.1  | 0.2  |
| AT1G30740 | FAD-binding and BBE domain-containing protein            | 2.5                                          | 0.1  | 0.5  | -0.1 | 0.4                                     | 0.0  | 1.6  | 0.6  |
| AT1G32940 | Subtilase 3.5                                            | 3.0                                          | 1.8  | 1.7  | 0.1  | 0.3                                     | 0.8  | 1.5  | 0.0  |
| AT1G35140 | protein EXORDIUM LIKE 1                                  | 2.4                                          | 1.5  | 0.0  | 0.1  | 2.1                                     | 2.0  | 1.9  | 1.4  |
| AT1G48000 | myb domain protein 112                                   | 3.2                                          | 2.0  | 2.0  | -0.2 | 3.1                                     | 3.7  | 3.5  | 1.6  |
| AT1G51340 | MATE efflux family protein                               | 3.3                                          | 0.6  | 0.4  | -0.1 | 0.2                                     | 0.0  | 0.2  | 0.1  |
| AT1G51830 | putative leucine-rich repeat protein kinase              | 2.2                                          | 1.4  | 1.0  | -0.2 | 1.3                                     | -2.1 | -0.8 | 0.1  |
| AT1G55780 | hypothetical protein                                     | 3.3                                          | 1.1  | 0.4  | 0.3  | 2.6                                     | 1.0  | 1.7  | 2.6  |
| AT1G57990 | purine permease 18                                       | 2.5                                          | 1.3  | 1.1  | 0.3  | 1.8                                     | 2.7  | 4.0  | 1.1  |
| AT1G62240 | hypothetical protein                                     | 3.1                                          | 0.8  | 0.4  | -0.4 | 0.1                                     | 0.7  | 1.3  | 0.3  |
| AT1G66180 | aspartyl protease family protein                         | 2.6                                          | 1.6  | 0.8  | -0.3 | 3.2                                     | 1.4  | 1.2  | 0.5  |
| AT1G67070 | mannose-6-phosphate isomerase                            | 2.7                                          | 1.2  | 1.0  | 0.2  | 1.8                                     | 2.2  | 4.7  | 0.7  |
| AT1G68320 | R2R3-MYB transcription family                            | 2.8                                          | 0.7  | 2.2  | -0.2 | 0.5                                     | 0.6  | 0.9  | 0.3  |
| AT1G69120 | Floral homeotic protein APETALA 1                        | 2.6                                          | -0.3 | 2.4  | -0.3 | 0.0                                     | -0.3 | 0.4  | 0.2  |
| AT1G69880 | thioredoxin H8                                           | 2.8                                          | 0.0  | 1.0  | 1.0  | 0.5                                     | 0.9  | 3.1  | 0.5  |
| AT1G70170 | matrix metalloproteinase                                 | 2.6                                          | 1.4  | 1.3  | 0.4  | 2.0                                     | 1.8  | 2.6  | 1.2  |
| AT1G72890 | TIR-NBS class of disease resistance protein              | 3.8                                          | 1.0  | 1.0  | 0.2  | 2.6                                     | 1.9  | 2.1  | 0.1  |
| AT1G74000 | strictosidine synthase 3                                 | 2.4                                          | 0.5  | 1.5  | 0.4  | 1.1                                     | 1.1  | 3.8  | 1.4  |
| AT1G74810 | boron transporter 5                                      | 2.3                                          | -0.3 | -1.0 | -1.1 | -0.6                                    | -0.3 | -0.2 | -0.8 |
| AT1G75030 | thaumatin-like protein 3                                 | 2.9                                          | 0.3  | 0.8  | 0.8  | 1.2                                     | -0.1 | -0.4 | 1.2  |
| AT1G76650 | calcium-binding protein CML38                            | 2.5                                          | 1.0  | 1.4  | 0.1  | 1.7                                     | 3.2  | 4.4  | 2.1  |
| AT1G78340 | glutathione S-transferase TAU 22                         | 2.7                                          | 0.9  | -1.9 | 0.0  | 3.2                                     | 2.1  | -0.1 | 2.0  |
| AT1G80110 | phloem protein 2-B11                                     | 2.4                                          | 0.2  | 0.1  | -0.1 | 2.4                                     | 1.7  | 1.1  | 1.3  |
| AT2G01300 | hypothetical protein                                     | 3.1                                          | 0.9  | 0.6  | -0.3 | 1.6                                     | 1.5  | 3.0  | 1.5  |
| AT2G02270 |                                                          | 2.9                                          | 0.8  | 0.7  | -0.2 | 0.8                                     | 1.2  | 0.8  | 0.3  |
| AT2G02300 | phloem protein 2-B5                                      | 3.1                                          | 1.0  | 0.9  | 0.5  | 0.8                                     | 0.8  | 0.4  | 0.4  |
| AT2G03850 | late embryogenesis abundant protein (LEA) family protein | 3.4                                          | 1.4  | 0.8  | 0.3  | 1.3                                     | 1.7  | 1.8  | 0.1  |
| AT2G04460 |                                                          | 2.5                                          | 0.9  | 2.4  | 0.0  | -0.1                                    | -0.2 | 0.3  | -0.2 |
| AT2G11810 | Monogalactosyldiacylglycerol synthase 3                  | 2.6                                          | -0.1 | 0.0  | 0.1  | 0.6                                     | -0.6 | -0.2 | -0.9 |
| AT2G17500 | auxin efflux carrier family protein                      | 2.2                                          | 0.0  | -0.1 | 0.0  | 2.3                                     | 0.6  | 1.3  | 1.0  |
| AT2G18480 | putative polyol transporter 3                            | 3.5                                          | 1.1  | 0.1  | 0.3  | 2.8                                     | -0.2 | -0.1 | 0.9  |
| AT2G18550 | homeobox-leucine zipper protein ATHB-21                  | 2.7                                          | 0.5  | 1.1  | 0.5  | 0.6                                     | -0.1 | 1.9  | 0.0  |
| AT2G19900 | NADP-dependent malic enzyme 1                            | 2.5                                          | 1.4  | 1.8  | -0.1 | 2.0                                     | 1.5  | 2.4  | 0.3  |

|           |                                                               |     |      |      |      |      |      |      |      |
|-----------|---------------------------------------------------------------|-----|------|------|------|------|------|------|------|
| AT2G21400 | SHI-related sequence3                                         | 2.7 | 1.1  | 0.1  | -0.8 | 0.6  | 0.5  | 0.3  | 0.1  |
| AT2G25460 | hypothetical protein                                          | 2.2 | 1.6  | 1.7  | 0.2  | 1.9  | 3.9  | 4.1  | 2.4  |
| AT2G26480 | UDP-glucosyl transferase 76D1                                 | 2.9 | 1.9  | 0.7  | 0.8  | 1.5  | 2.0  | 0.4  | 0.9  |
| AT2G26690 | nitrate transporter 1.4                                       | 2.7 | -0.4 | 0.2  | -0.1 | 1.9  | 0.2  | 1.1  | -0.1 |
| AT2G27535 | ribosomal protein L10A family protein                         | 2.9 | 0.2  | 0.1  | 0.6  | 0.0  | 1.4  | 0.1  | 0.9  |
| AT2G27830 | hypothetical protein                                          | 2.2 | 1.6  | 1.3  | 0.2  | 1.2  | 1.4  | 3.1  | 0.6  |
| AT2G28700 | protein agamous-like 46                                       | 3.8 | 1.9  | 0.5  | 0.6  | 0.2  | 0.1  | 0.3  | 0.1  |
| AT2G29250 | concanavalin A-like lectin protein kinase-like protein        | 2.7 | 2.1  | 1.2  | 0.7  | 0.1  | -0.3 | 0.3  | 0.3  |
| AT2G29380 | highly ABA-induced PP2C protein 3                             | 3.6 | 0.5  | 0.6  | 0.3  | 1.5  | 1.2  | 0.8  | 1.5  |
| AT2G29450 | glutathione S-transferase tau 5                               | 2.7 | 0.5  | 1.9  | 0.7  | 2.4  | 2.9  | 4.6  | 1.8  |
| AT2G30140 | UDP-glycosyltransferase 87A2                                  | 2.1 | 1.8  | 1.0  | 0.3  | 2.4  | 3.6  | 3.9  | 1.6  |
| AT2G31560 | hypothetical protein                                          | 2.9 | 0.3  | -0.4 | 0.2  | 1.6  | 0.4  | 1.1  | 0.8  |
| AT2G32190 | hypothetical protein                                          | 3.6 | 1.7  | 1.6  | 0.4  | 2.9  | 3.0  | 4.0  | 1.6  |
| AT2G32660 | receptor like protein 22                                      | 2.2 | 1.0  | 1.6  | -0.1 | 0.5  | 2.7  | 3.7  | 0.7  |
| AT2G32830 | putative inorganic phosphate transporter 1-5                  | 2.6 | 1.1  | 1.6  | 0.7  | 0.2  | 0.3  | 0.3  | -0.1 |
| AT2G33380 | caleosin 3                                                    | 3.4 | -1.6 | -1.0 | 0.5  | 1.5  | 0.3  | 1.3  | 0.2  |
| AT2G35370 | glycine decarboxylase complex protein H                       | 2.5 | 0.3  | 1.3  | 0.3  | 0.3  | 1.2  | 0.5  | 0.2  |
| AT2G36440 | hypothetical protein                                          | 2.9 | 1.6  | 0.2  | 0.0  | 0.1  | 0.6  | 0.2  | 0.0  |
| AT2G37330 | protein aluminum sensitive 3                                  | 2.1 | 0.7  | 0.3  | 0.2  | 0.8  | 0.0  | -0.2 | -0.2 |
| AT2G38790 | hypothetical protein                                          | 3.9 | 1.0  | 1.4  | 0.2  | 1.8  | 1.5  | 1.9  | 1.5  |
| AT2G39510 | nodulin MtN21-like transporter family protein                 | 6.2 | 0.3  | 0.1  | 1.2  | 1.9  | 1.4  | 0.3  | -0.1 |
| AT2G40880 | cysteine proteinase inhibitor 3                               | 3.1 | 0.6  | -0.3 | -0.2 | 2.2  | 1.5  | 1.2  | 1.2  |
| AT2G41850 | polygalacturonase ADPG2                                       | 3.1 | -0.4 | 0.1  | -0.3 | 0.6  | 1.2  | 2.3  | 0.8  |
| AT2G44175 | N-myristoyltransferase-related protein                        | 2.9 | -0.4 | 0.3  | 0.0  | 0.2  | -0.1 | 0.0  | -0.1 |
| AT3G01290 | SPFH/Band 7/PHB domain-containing membrane-associated protein | 2.7 | 1.8  | 1.5  | 0.2  | 1.1  | 1.2  | 2.7  | 0.1  |
| AT3G01830 | putative calcium-binding protein CML40                        | 2.5 | 1.8  | 1.4  | 0.7  | 2.1  | 3.3  | 4.3  | 3.6  |
| AT3G01990 | ACT domain-containing protein 6                               | 2.5 | 1.1  | 1.3  | 0.2  | 0.7  | 1.9  | 1.5  | -0.2 |
| AT3G03640 | beta glucosidase 25                                           | 3.6 | 0.7  | 0.1  | -0.2 | 3.4  | 1.8  | 1.1  | 1.7  |
| AT3G05400 | sugar transporter ERD6-like 12                                | 3.1 | 1.2  | -0.9 | 0.1  | 0.4  | 0.1  | 0.9  | 0.0  |
| AT3G06210 | hypothetical protein                                          | 2.9 | 0.2  | -0.3 | -0.1 | 1.8  | 0.5  | 0.3  | -0.1 |
| AT3G06490 | putative transcription factor MYB108                          | 3.2 | 1.6  | 2.1  | -0.6 | 2.1  | 4.0  | 4.2  | 2.0  |
| AT3G08770 | lipid-transfer protein 6                                      | 2.7 | 0.4  | 0.4  | 0.5  | 0.4  | 0.1  | 0.1  | -0.1 |
| AT3G08870 | concanavalin A-like lectin protein kinase family protein      | 3.2 | 1.6  | -0.3 | 0.6  | -0.1 | 0.0  | 0.1  | 0.0  |
| AT3G09220 | laccase 7                                                     | 2.6 | 1.9  | 1.6  | 0.4  | 0.6  | 0.5  | 1.5  | 0.8  |
| AT3G14770 | bidirectional sugar transporter SWEET2                        | 2.8 | 0.0  | 1.2  | -0.3 | 1.2  | 1.0  | 2.4  | 0.1  |
| AT3G17520 | late embryogenesis abundant protein (LEA) family protein      | 3.9 | -1.1 | -0.9 | -0.9 | -0.4 | -0.1 | -0.4 | 0.4  |
| AT3G21790 | UDP-glycosyltransferase 71B7                                  | 6.0 | 0.9  | 0.4  | -0.5 | 1.7  | 0.3  | 3.0  | 0.2  |
| AT3G22240 | hypothetical protein                                          | 2.8 | 1.5  | 1.1  | 0.0  | 2.2  | 0.6  | 2.5  | 0.1  |
| AT3G26740 | CCR-like protein                                              | 2.8 | 0.1  | 0.1  | 0.2  | 0.5  | 0.2  | 2.2  | 0.3  |
| AT3G27810 | transcription factor MYB21                                    | 4.3 | -0.1 | 2.1  | -0.1 | -0.3 | -0.2 | 0.8  | 0.5  |
| AT3G30842 | pleiotropic drug resistance 10                                | 2.4 | 0.4  | 0.3  | 0.4  | 0.1  | 0.2  | 0.0  | 0.1  |
| AT3G44880 | pheophorbide A oxygenase                                      | 2.8 | 0.9  | 1.0  | 0.0  | 0.8  | 1.4  | 2.0  | 0.1  |
| AT3G48340 | KDEL-tailed cysteine endopeptidase CEP2                       | 3.7 | 0.7  | 0.8  | -0.7 | 2.7  | -1.0 | -0.3 | -0.4 |
| AT3G48460 | GDSL esterase/lipase                                          | 2.2 | 0.9  | 1.8  | 0.0  | 1.2  | 0.7  | 1.8  | 0.1  |
| AT3G48520 | cytochrome P450, family 94, subfamily B, polypeptide 3        | 3.9 | 1.1  | 1.6  | 0.7  | 0.4  | 1.1  | 3.2  | 0.8  |
| AT3G51895 | sulfate transporter 3;1                                       | 3.8 | 1.3  | 1.9  | -0.4 | 2.9  | 1.0  | 1.4  | 0.3  |
| AT3G52820 | purple acid phosphatase 22                                    | 3.6 | 0.2  | 0.9  | 0.0  | 1.9  | 0.3  | 1.0  | 0.3  |
| AT3G55790 | hypothetical protein                                          | 2.8 | 1.9  | 0.2  | -0.1 | 0.4  | 0.6  | 0.0  | 0.0  |
| AT3G55910 | hypothetical protein                                          | 2.2 | -0.4 | -0.2 | -0.2 | 0.6  | -0.1 | 0.8  | -0.1 |
| AT3G60130 | beta glucosidase 16                                           | 2.2 | 0.1  | 0.7  | 0.0  | 1.9  | 1.8  | 2.4  | 0.4  |
| AT3G61390 | U-box domain-containing protein 36                            | 2.7 | 0.4  | 0.2  | 0.1  | 1.7  | 2.0  | 2.8  | 1.5  |
| AT3G61890 | homeobox-leucine zipper protein ATHB-12                       | 3.2 | -0.9 | -0.6 | 0.0  | 1.7  | 0.9  | 1.6  | 0.6  |
| AT3G62730 | hypothetical protein                                          | 3.2 | -0.9 | -0.8 | 0.4  | 0.8  | 0.0  | 0.3  | 0.6  |
| AT3G63380 | putative calcium-transporting ATPase 12                       | 2.8 | 1.9  | 1.7  | 0.6  | 0.9  | 2.6  | 3.7  | 1.5  |
| AT4G02170 | hypothetical protein                                          | 2.3 | 1.4  | 0.1  | -0.7 | 1.1  | -0.2 | -0.2 | 0.7  |
| AT4G02280 | sucrose synthase 3                                            | 3.1 | 0.5  | 0.5  | 0.3  | 0.7  | 0.4  | 1.2  | 0.3  |

|           |                                                                             |     |      |      |      |      |      |      |      |
|-----------|-----------------------------------------------------------------------------|-----|------|------|------|------|------|------|------|
| AT4G04460 | aspartic proteinase A3                                                      | 2.3 | -0.1 | -0.1 | -0.1 | 0.9  | -1.2 | -2.2 | -0.2 |
| AT4G04490 | cysteine-rich receptor-like protein kinase 36                               | 2.4 | 1.5  | 0.5  | 0.3  | 1.8  | 2.0  | 0.9  | 2.3  |
| AT4G09120 | putative RING-H2 finger protein ATL36                                       | 4.5 | 1.5  | 2.2  | 0.2  | 0.4  | 0.1  | 0.3  | 0.0  |
| AT4G09940 | P-loop containing nucleoside triphosphate hydrolases superfamily protein    | 2.5 | 0.2  | -1.2 | 0.0  | 1.1  | 0.6  | 0.2  | 0.1  |
| AT4G12870 | Gamma interferon responsive lysosomal thiol (GILT) reductase family protein | 2.7 | 1.2  | 1.4  | 0.8  | 1.5  | -0.1 | -0.8 | -0.9 |
| AT4G13250 | probable chlorophyll(ide) b reductase NYC1                                  | 3.8 | 0.1  | 0.2  | 0.2  | 2.0  | 1.0  | 3.8  | 0.3  |
| AT4G13920 | receptor like protein 50                                                    | 2.3 | 1.7  | 1.5  | 0.1  | 0.4  | 1.0  | 0.6  | 0.1  |
| AT4G16620 | nodulin MtN21 /EamA-like transporter family protein                         | 2.6 | 0.3  | -0.2 | 0.1  | 1.3  | 1.0  | 0.2  | -0.2 |
| AT4G18170 | WRKY DNA-binding protein 28                                                 | 2.5 | 1.8  | 1.9  | 0.1  | 1.5  | 2.2  | 3.7  | 1.3  |
| AT4G18350 | 9-cis-epoxycarotenoid dioxygenase NCED2                                     | 5.1 | 1.3  | 1.3  | 0.3  | 2.1  | 0.8  | 2.4  | 1.0  |
| AT4G19515 |                                                                             | 3.0 | 1.7  | 1.7  | 1.3  | 0.5  | 2.5  | 1.4  | 1.8  |
| AT4G19810 | Class V chitinase                                                           | 2.9 | 1.6  | 0.6  | 0.7  | 1.7  | 2.9  | 1.9  | 1.3  |
| AT4G19820 | Glycosyl hydrolase family protein with chitinase insertion domain           | 2.8 | 1.6  | 0.6  | 0.7  | 0.8  | 1.9  | 0.6  | 0.4  |
| AT4G21440 | R2R3 family MYB transcription factor                                        | 3.4 | 0.9  | -0.9 | -0.7 | 0.2  | 1.2  | 0.8  | 0.0  |
| AT4G21650 | Subtilase family protein                                                    | 2.5 | 0.4  | 1.4  | -0.3 | 0.2  | 0.5  | 0.3  | 0.0  |
| AT4G22070 | WRKY DNA-binding protein 31                                                 | 2.6 | 1.3  | -0.1 | 0.8  | 2.0  | 1.9  | 1.9  | 1.5  |
| AT4G24660 | ZF-HD homeobox protein                                                      | 3.2 | -0.5 | 0.4  | 0.1  | -0.1 | 0.1  | 0.3  | 0.0  |
| AT4G24690 | autophagy substrate NBR1                                                    | 2.8 | 0.5  | 0.3  | -0.1 | 2.1  | 1.8  | 2.0  | 0.3  |
| AT4G28530 | NAC domain containing protein 74                                            | 2.5 | 0.1  | 1.0  | -0.3 | 0.6  | 0.0  | 0.2  | -0.2 |
| AT4G29640 | cytidine/deoxycytidylate deaminase family protein                           | 3.3 | 0.8  | 0.3  | -0.9 | 0.1  | 0.6  | 0.7  | -0.3 |
| AT4G31330 | hypothetical protein                                                        | 2.5 | 2.0  | -0.2 | 0.4  | 1.0  | 0.5  | -0.4 | -0.5 |
| AT4G31710 | glutamate receptor 2.4                                                      | 2.8 | -0.7 | 0.2  | 0.1  | 0.7  | -0.5 | 0.2  | 0.1  |
| AT4G33666 | hypothetical protein                                                        | 2.6 | -0.4 | -0.9 | -0.1 | 1.3  | 0.4  | 0.9  | 0.2  |
| AT4G34320 | hypothetical protein                                                        | 3.1 | 0.2  | 0.8  | 0.0  | 1.8  | 0.4  | 0.2  | 0.1  |
| AT4G34330 | hypothetical protein                                                        | 3.0 | 0.1  | 0.8  | 0.1  | 1.8  | 0.2  | 0.5  | 0.2  |
| AT4G34710 | arginine decarboxylase 2                                                    | 3.2 | 1.4  | 0.5  | 0.1  | 3.4  | 1.3  | 2.7  | 1.0  |
| AT5G01300 | putative phosphatidylethanolamine-binding protein                           | 2.5 | 1.9  | 1.1  | 0.7  | 0.3  | 0.2  | 0.2  | 0.0  |
| AT5G01640 | prenylated RAB acceptor 1.B5                                                | 2.6 | 1.3  | 0.4  | 0.3  | 1.8  | 2.1  | 1.3  | 0.7  |
| AT5G02020 | hypothetical protein                                                        | 2.3 | 1.6  | 1.8  | 0.4  | 1.1  | 1.5  | 1.9  | 0.4  |
| AT5G03210 | hypothetical protein                                                        | 3.4 | 1.5  | 0.6  | 0.4  | 1.5  | 1.1  | 0.8  | 3.0  |
| AT5G04120 | phosphoglycerate mutase-like protein                                        | 4.3 | 0.4  | 2.2  | 1.3  | 0.9  | 0.1  | 0.3  | 0.6  |
| AT5G06320 | NDR1/HIN1-Like protein 3                                                    | 3.8 | 1.6  | 1.1  | 0.3  | 2.8  | 3.4  | 4.0  | 1.8  |
| AT5G09930 | ABC transporter F family member 2                                           | 2.9 | -0.1 | -0.2 | 0.1  | -0.3 | -0.4 | -0.3 | -0.3 |
| AT5G10120 | putative ethylene insensitive 3-like 4 protein                              | 3.0 | 0.5  | 0.1  | -0.1 | 0.0  | 0.0  | 0.3  | -0.1 |
| AT5G10695 | hypothetical protein                                                        | 2.2 | 1.3  | 1.2  | -0.1 | 1.6  | 2.6  | 3.0  | 1.6  |
| AT5G11210 | glutamate receptor 2.5                                                      | 2.2 | 1.5  | -0.3 | 0.3  | 1.2  | 2.0  | 1.6  | 0.9  |
| AT5G11410 | protein kinase family protein                                               | 2.9 | 1.7  | 0.9  | 0.5  | 0.0  | 0.2  | 0.5  | 0.2  |
| AT5G11670 | NADP-dependent malic enzyme 2                                               | 2.3 | 1.5  | 1.9  | -0.1 | 2.1  | 1.8  | 2.6  | 0.3  |
| AT5G13200 | GRAM domain family protein                                                  | 2.9 | 1.4  | 1.1  | 0.2  | 1.6  | 2.4  | 2.4  | 1.6  |
| AT5G13670 | nodulin MtN21-like transporter UMAMIT 15                                    | 2.4 | -1.0 | -0.4 | -0.3 | 0.5  | -0.2 | 0.3  | 0.5  |
| AT5G16010 | 3-oxo-5-alpha-steroid 4-dehydrogenase family protein                        | 4.0 | 1.1  | 0.5  | -0.1 | 3.1  | 2.9  | 3.4  | 1.9  |
| AT5G17860 | calcium exchanger 7                                                         | 4.0 | 1.6  | 0.8  | -0.1 | 0.4  | 0.0  | 0.2  | 0.0  |
| AT5G18170 | glutamate dehydrogenase 1                                                   | 2.3 | 1.1  | 0.9  | 0.4  | 2.3  | -0.8 | 1.1  | 0.4  |
| AT5G20000 | AAA-type ATPase family protein                                              | 2.3 | 0.5  | 1.0  | 0.2  | 1.4  | 1.1  | 2.0  | 0.1  |
| AT5G24860 | flowering promoting factor 1                                                | 3.7 | 0.9  | 0.5  | 0.4  | 0.9  | 1.6  | 0.4  | 0.6  |
| AT5G25460 | hypothetical protein                                                        | 3.1 | 1.1  | 1.4  | 0.2  | 2.6  | -4.6 | -2.7 | -0.1 |
| AT5G25910 | receptor like protein 52                                                    | 2.3 | 1.7  | 0.7  | 0.2  | 0.9  | 1.0  | 1.7  | 0.5  |
| AT5G39520 | hypothetical protein                                                        | 7.6 | 1.4  | 1.4  | 0.2  | 2.4  | 1.1  | 2.6  | -0.2 |
| AT5G42800 | dihydroflavonol-4-reductase                                                 | 3.2 | 1.5  | -1.1 | 0.1  | 0.0  | 0.4  | -0.2 | -0.1 |
| AT5G43980 | plasmodesmata-located protein 1                                             | 3.1 | 1.1  | 0.6  | 0.3  | 0.9  | 0.5  | 1.4  | 0.3  |
| AT5G44390 | FAD-binding Berberine family protein                                        | 3.4 | 0.8  | -0.4 | 0.6  | 1.4  | 0.8  | 1.4  | 1.4  |
| AT5G48180 | nitrile specifier protein 5                                                 | 2.8 | 0.0  | -0.2 | 0.2  | 1.9  | 1.2  | 2.5  | 0.6  |
| AT5G49350 | glycine-rich protein                                                        | 2.6 | 0.8  | 0.9  | 0.7  | 2.0  | -0.9 | -1.0 | 1.9  |
| AT5G49690 | UDP-glycosyltransferase 91C1                                                | 2.9 | 1.8  | 1.6  | 0.0  | 1.0  | 2.7  | 3.6  | 0.3  |

|           |                                                                |     |      |      |      |      |      |      |      |
|-----------|----------------------------------------------------------------|-----|------|------|------|------|------|------|------|
| AT5G50130 | Rossmann-fold NAD(P)-binding domain-containing protein         | 2.6 | 2.0  | 1.2  | 0.1  | 0.8  | 1.8  | 2.6  | 0.0  |
| AT5G50360 | hypothetical protein                                           | 3.2 | -0.3 | -0.3 | -0.2 | 0.2  | 0.1  | 0.4  | 0.0  |
| AT5G53820 | Late embryogenesis abundant protein (LEA) family protein       | 2.8 | 1.6  | 0.5  | 0.4  | 1.9  | 2.9  | 0.7  | 3.6  |
| AT5G56510 | pumilio 12 xyloglucan                                          | 3.2 | 1.0  | 1.1  | 0.8  | 0.0  | -0.1 | 0.3  | 0.2  |
| AT5G57560 | endotransglucosylase/hydrolase protein 22                      | 3.1 | 1.2  | 1.2  | 0.4  | 3.9  | 2.5  | 3.8  | 2.8  |
| AT5G58070 | temperature-induced lipocalin TIL1                             | 2.2 | 0.0  | -0.2 | -0.2 | 1.5  | 0.2  | 0.9  | 0.6  |
| AT5G58330 | lactate/malate dehydrogenase family protein                    | 2.6 | 0.5  | 0.4  | 0.3  | 0.9  | 0.3  | 2.1  | 0.9  |
| AT5G58570 | hypothetical protein                                           | 2.2 | 0.2  | -0.6 | -0.2 | 1.2  | -0.3 | -0.4 | 0.2  |
| AT5G59230 | transcription factor-related protein                           | 2.5 | 2.5  | 2.1  | 0.3  | -0.1 | 1.3  | -0.2 | -0.4 |
| AT5G59390 | XH/XS domain-containing protein                                | 4.4 | 0.8  | 1.4  | -0.2 | 0.6  | 0.3  | 0.8  | 0.3  |
| AT5G59490 | haloacid dehalogenase-like hydrolase (HAD) superfamily protein | 2.7 | 1.7  | 1.5  | 0.4  | 3.2  | 3.2  | 4.0  | 1.9  |
| AT5G59820 | high light responsive zinc finger protein ZAT12                | 3.5 | 1.6  | 1.7  | 0.4  | 1.6  | 2.4  | 2.4  | 1.7  |
| AT5G61430 | NAC domain containing protein 100                              | 2.7 | 1.5  | 0.0  | 0.5  | 1.6  | 1.0  | -0.3 | 0.9  |
| AT5G62520 | probable inactive poly [ADP-ribose] polymerase SRO5            | 2.4 | 1.3  | 0.6  | -0.2 | 0.9  | 2.1  | 1.9  | 1.3  |
| AT5G64210 | alternative oxidase 2                                          | 3.0 | 0.3  | 0.7  | -0.5 | 1.0  | -0.5 | -0.6 | 1.1  |
| AT5G64490 | pumilio homolog 26                                             | 2.7 | 0.4  | 0.5  | 0.0  | 0.1  | 0.3  | -0.2 | 0.0  |
| AT5G65100 | Ethylene insensitive 3 family protein                          | 2.7 | 0.5  | -0.1 | -0.8 | 0.4  | -0.1 | 0.3  | -0.1 |
| AT5G65990 | transmembrane amino acid transporter family protein            | 2.3 | 0.7  | 1.1  | 0.2  | 0.3  | 0.4  | 0.2  | 0.3  |
| AT5G66700 | homeobox-leucine zipper protein ATHB-53                        | 2.3 | 1.7  | 0.5  | -0.8 | 1.8  | 1.9  | 3.1  | 0.9  |

---

Averaged values of fold change in three microarray replicates were shown.
