# Supplementary material
Source: publisher figshare collection journal article supplement (https://tandf.figshare.com/articles/dataset/_/6741470)
Supplement: Supplementary file 3 [file 1 › tssp_a_1454253_sm3289.pdf]

**Supplementary Table S2. Specifically expressed genes under mild Cd stress**

| Gene ID   | Description                                                             | Average log <sub>2</sub> FC value under mild |     |      |      | Average log <sub>2</sub> FC value under |      |      |      |
|-----------|-------------------------------------------------------------------------|----------------------------------------------|-----|------|------|-----------------------------------------|------|------|------|
|           |                                                                         | Al                                           | Cd  | Cu   | Na   | Al                                      | Cd   | Cu   | Na   |
| AT1G01560 | mitogen-activated protein kinase 11                                     | 1.7                                          | 2.7 | 1.7  | 0.7  | -0.3                                    | 2.9  | 1.6  | 0.7  |
| AT1G02220 | NAC domain-containing protein 3                                         | 1.7                                          | 2.0 | 1.9  | 0.3  | 0.9                                     | 3.2  | 3.3  | 1.1  |
| AT1G02250 | NAC domain-containing protein 5                                         | -0.1                                         | 2.4 | 1.5  | -0.1 | 0.3                                     | 1.8  | 0.7  | 0.0  |
| AT1G07400 | class I heat shock protein                                              | 1.2                                          | 2.8 | 0.4  | 0.2  | 1.5                                     | 3.9  | 1.1  | 3.4  |
| AT1G07440 | NAD(P)-binding Rossmann-fold superfamily protein                        | -0.3                                         | 2.2 | 1.0  | -0.2 | 0.1                                     | 0.7  | 0.0  | 0.0  |
| AT1G07720 | 3-ketoacyl-CoA synthase 3                                               | 1.1                                          | 2.2 | -0.2 | 0.0  | 0.6                                     | 1.4  | 0.1  | 1.4  |
| AT1G14540 | peroxidase 4                                                            | 0.0                                          | 2.1 | 0.2  | 0.8  | 0.3                                     | 3.5  | 4.8  | 3.0  |
| AT1G14880 | cadmium resistance protein 1                                            | -0.4                                         | 2.8 | 2.1  | -0.5 | 0.4                                     | 1.6  | 0.5  | -0.2 |
| AT1G15630 |                                                                         | 2.1                                          | 3.6 | 2.1  | -0.2 | 0.2                                     | 0.8  | 0.0  | -0.3 |
| AT1G15640 | hypothetical protein                                                    | 0.8                                          | 2.3 | 1.6  | 0.0  | 0.3                                     | 0.5  | 0.1  | -0.1 |
| AT1G16030 | heat shock protein 70B                                                  | 0.4                                          | 2.6 | -0.1 | 0.0  | 1.0                                     | 2.9  | 1.5  | 0.8  |
| AT1G21250 | wall-associated receptor kinase 1                                       | 2.1                                          | 4.2 | 2.2  | 1.4  | 0.2                                     | 1.9  | 1.1  | 0.2  |
| AT1G21945 |                                                                         | 1.3                                          | 2.6 | 0.0  | 0.1  | -0.2                                    | 1.1  | 0.0  | -0.3 |
| AT1G22210 | probable trehalose-phosphate phosphatase C                              | 0.5                                          | 3.7 | 1.6  | -0.3 | -0.3                                    | -0.3 | -0.1 | -0.2 |
| AT1G35730 | protein pumilio 9                                                       | 2.0                                          | 2.8 | 0.6  | -0.2 | 0.4                                     | 1.8  | 0.6  | 0.4  |
| AT1G48720 | hypothetical protein                                                    | 1.1                                          | 2.8 | -0.6 | 0.0  | 0.2                                     | 3.3  | 1.0  | 0.5  |
| AT1G49750 | leucine-rich repeat (LRR) family protein                                | 0.9                                          | 2.1 | 0.7  | -0.2 | 1.2                                     | 0.8  | -0.5 | 0.7  |
| AT1G51420 | sucrose-phosphatase 1                                                   | 0.7                                          | 2.0 | 1.4  | 0.2  | 1.3                                     | 2.0  | 1.6  | 0.9  |
| AT1G59860 | HSP20-like chaperone                                                    | 1.5                                          | 2.0 | 0.5  | 0.2  | 0.4                                     | 2.3  | 0.5  | 1.5  |
| AT1G60730 | probable aldo-keto reductase 5                                          | 1.2                                          | 2.4 | 1.9  | 0.7  | 2.0                                     | 4.1  | 3.9  | 2.0  |
| AT1G62580 | flavin-containing monooxygenase FMO GS-OX-like 7                        | -0.3                                         | 2.6 | -0.3 | 0.2  | -0.3                                    | 0.5  | -0.5 | -0.7 |
| AT1G66170 | PHD finger protein MALE MEIOCYTE DEATH 1                                | 0.1                                          | 2.3 | 0.6  | 0.4  | 0.0                                     | 0.7  | 0.1  | 0.1  |
| AT1G66830 | probable inactive leucine-rich repeat receptor-like protein kinase      | 1.5                                          | 3.4 | 2.4  | -1.2 | -0.1                                    | -0.9 | 0.1  | 0.5  |
| AT1G71000 | chaperone DnaJ-domain containing protein                                | 1.6                                          | 3.3 | 0.4  | 0.2  | 0.1                                     | 2.1  | 0.3  | 0.6  |
| AT1G72910 | Toll-Interleukin-Resistance domain-containing protein                   | 0.7                                          | 3.5 | 0.8  | 1.1  | 0.0                                     | 1.4  | 0.6  | 0.0  |
| AT1G74590 | glutathione S-transferase TAU 10                                        | 1.9                                          | 2.0 | 0.8  | 0.9  | 1.6                                     | 3.0  | 3.1  | 2.1  |
| AT2G02580 | cytochrome P450 71B9                                                    | 0.8                                          | 3.1 | 2.0  | 0.7  | -0.3                                    | 0.3  | -0.2 | -0.1 |
| AT2G13810 | AGD2-like defense response protein 1                                    | -0.7                                         | 4.1 | 1.7  | 1.1  | 0.6                                     | 2.7  | 0.2  | 0.6  |
| AT2G19190 | FLG22-induced receptor-like kinase 1                                    | 0.0                                          | 2.2 | 0.4  | -0.7 | -0.1                                    | 3.2  | 2.6  | 0.2  |
| AT2G19500 | cytokinin oxidase 2                                                     | -0.9                                         | 2.8 | 2.2  | 0.3  | -0.7                                    | -0.4 | 1.7  | 0.0  |
| AT2G24600 | Ankyrin repeat family protein                                           | 0.6                                          | 2.0 | 0.9  | 0.4  | 1.4                                     | 2.6  | 1.3  | 2.4  |
| AT2G29110 | glutamate receptor 2.8                                                  | -0.1                                         | 2.5 | 0.5  | 0.8  | -0.1                                    | 0.9  | 0.0  | 1.0  |
| AT2G29320 | tropinone reductase-like protein                                        | -0.4                                         | 2.4 | 0.7  | -0.2 | -0.1                                    | 0.0  | 0.1  | 0.7  |
| AT2G30660 |                                                                         | 0.1                                          | 2.9 | 2.2  | -0.3 | 0.6                                     | 1.3  | 0.1  | -0.2 |
| AT2G36690 | 2-oxoglutarate (2OG) and Fe(II)-dependent oxygenase superfamily protein | -3.5                                         | 2.0 | 1.3  | 0.2  | -3.7                                    | 1.9  | 0.7  | 2.9  |
| AT2G40750 | WRKY DNA-binding protein 54                                             | 0.3                                          | 2.6 | 1.6  | 0.6  | 0.0                                     | 0.3  | -0.3 | -0.2 |
| AT2G41090 | calmodulin-like protein 10                                              | 0.5                                          | 2.7 | 0.9  | 0.2  | 1.5                                     | 1.6  | 0.4  | 0.6  |
| AT2G43820 | UDP-glucosyltransferase 74F2                                            | -1.7                                         | 2.0 | 1.0  | 0.4  | -1.0                                    | 0.4  | -0.4 | 0.2  |
| AT2G45550 | cytochrome P450 76C4                                                    | 0.2                                          | 2.6 | 1.7  | 0.4  | 0.0                                     | 1.0  | 0.3  | -0.2 |
| AT3G02840 | hypothetical protein                                                    | 1.6                                          | 2.2 | 2.1  | 0.7  | 1.4                                     | 4.0  | 4.8  | 3.6  |
| AT3G03430 | putative calcium-binding protein CML28                                  | 0.2                                          | 2.9 | 1.7  | 0.5  | 0.2                                     | 0.9  | 1.1  | 0.1  |
| AT3G03800 | syntaxin of plants 131                                                  | 0.1                                          | 2.6 | 1.7  | 0.1  | -0.1                                    | 0.1  | 0.3  | -0.1 |
| AT3G07600 | heavy-metal-associated domain-containing protein                        | -0.7                                         | 2.1 | 0.9  | 0.8  | -0.8                                    | 0.7  | -0.1 | 0.0  |
| AT3G12220 | serine carboxypeptidase-like 16                                         | 0.4                                          | 2.5 | 2.0  | 0.0  | 1.3                                     | 0.8  | 0.7  | -0.3 |
| AT3G13090 | multidrug resistance-associated protein 8                               | 1.9                                          | 2.5 | 1.8  | 0.6  | 1.7                                     | 3.3  | 1.3  | 1.0  |
| AT3G13100 | ABC transporter C family member 7                                       | 1.7                                          | 2.7 | 1.9  | 1.0  | 2.3                                     | 3.8  | 2.2  | 1.6  |
| AT3G16520 | UDP-glucosyl transferase 88A1                                           | 1.8                                          | 2.4 | 2.0  | 0.2  | 0.1                                     | 0.3  | 0.4  | 0.1  |
| AT3G22920 | cyclophilin-like peptidyl-prolyl cis-trans isomerase family protein     | 1.9                                          | 2.9 | 1.0  | 0.3  | 0.3                                     | 1.0  | 0.7  | 0.1  |
| AT3G29240 | hypothetical protein                                                    | 0.1                                          | 2.3 | 1.5  | 0.4  | 0.6                                     | 2.3  | 2.7  | 0.0  |
| AT3G44350 | putative NAC domain-containing protein 61                               | 0.0                                          | 3.8 | 2.7  | 1.2  | -0.1                                    | 0.9  | 0.2  | 1.2  |
| AT3G45720 | putative nitrate excretion transporter 7                                | 1.3                                          | 2.8 | 2.0  | -0.5 | 1.3                                     | 0.5  | -0.7 | -0.3 |

|           |                                                                      |      |     |      |      |      |      |      |      |
|-----------|----------------------------------------------------------------------|------|-----|------|------|------|------|------|------|
| AT3G46680 | UDP-glycosyltransferase 76E6                                         | 1.4  | 2.0 | 0.8  | 0.7  | 0.5  | 1.6  | 1.1  | 0.5  |
| AT3G48790 | Pyridoxal phosphate (PLP)-dependent transferases superfamily protein | 1.0  | 2.2 | 1.2  | -0.6 | 0.7  | 1.6  | 0.9  | -0.4 |
| AT3G48920 | myb domain protein 45                                                | 1.9  | 1.9 | 0.4  | 0.2  | 1.0  | 0.9  | 0.6  | 0.2  |
| AT3G49580 | protein RESPONSE TO LOW SULFUR 1                                     | 1.9  | 3.9 | 1.7  | 0.2  | 0.6  | 2.7  | 1.9  | 0.0  |
| AT3G50160 |                                                                      | -1.0 | 2.8 | 1.9  | 0.3  | -0.3 | -0.1 | -0.1 | 0.6  |
| AT3G50170 | hypothetical protein                                                 | 1.9  | 2.3 | 1.7  | -0.1 | 0.4  | 0.8  | 0.1  | -0.3 |
| AT3G50480 | RPW8-like protein 4                                                  | -0.7 | 2.5 | 1.3  | 0.6  | -0.1 | 2.5  | 1.6  | 2.0  |
| AT3G54050 | fructose-1,6-bisphosphatase                                          | -0.4 | 3.6 | 2.6  | -0.5 | -0.3 | 1.4  | 1.5  | -0.4 |
| AT3G54070 | ankyrin repeat-containing protein                                    | -0.3 | 2.7 | 2.1  | -0.3 | -0.1 | 0.1  | 0.0  | 0.1  |
| AT3G54150 | S-adenosyl-L-methionine-dependent methyltransferase-like protein     | 2.1  | 2.5 | 2.2  | 0.9  | 3.1  | 4.1  | 4.5  | 2.1  |
| AT3G56400 | WRKY transcription factor 70                                         | 1.8  | 2.7 | 1.3  | 1.1  | 0.4  | -0.6 | -0.5 | -0.1 |
| AT3G57700 | putative protein kinase                                              | 1.3  | 2.2 | 1.3  | 0.2  | 0.8  | 2.3  | 0.2  | 0.4  |
| AT3G60160 | multidrug resistance-associated protein 9                            | 0.1  | 2.4 | 2.4  | 1.1  | 0.4  | 1.0  | 0.5  | 1.1  |
| AT3G60970 | putative ABC transporter C-15                                        | 0.1  | 2.7 | 1.7  | 1.0  | 0.3  | 1.0  | 0.0  | 0.8  |
| AT4G04710 | calcium-dependent protein kinase 22                                  | 0.0  | 2.4 | 1.1  | -0.1 | 0.3  | 0.7  | 0.6  | 0.2  |
| AT4G08620 | sulfate transporter 1.1                                              | -3.9 | 2.5 | 1.1  | -1.1 | -0.9 | 1.0  | -0.2 | -1.3 |
| AT4G11890 | receptor-like cytosolic kinase ARCK1                                 | 2.2  | 2.7 | 2.3  | -0.2 | 1.3  | 2.2  | 0.5  | 1.3  |
| AT4G13900 |                                                                      | 0.7  | 2.8 | 1.1  | 0.6  | 0.0  | 0.4  | 0.3  | 0.0  |
| AT4G15530 | pyruvate, phosphate dikinase 1                                       | 1.5  | 2.2 | 1.4  | 0.9  | 0.3  | 0.4  | 2.2  | 0.1  |
| AT4G17785 | transcription factor MYB39                                           | 0.6  | 2.7 | 1.9  | 0.2  | 0.7  | 3.1  | 2.6  | 1.3  |
| AT4G18250 | putative receptor serine/threonine kinase                            | 1.2  | 2.2 | 2.0  | 0.4  | 0.8  | 2.6  | 2.0  | 1.1  |
| AT4G18990 | probable xyloglucan endotransglucosylase/hydrolase protein 29        | 2.2  | 3.0 | 2.6  | 0.6  | 0.1  | 1.6  | 1.3  | 0.1  |
| AT4G21366 | protein kinase family protein                                        | 1.0  | 3.8 | 1.7  | 1.4  | 0.2  | 2.4  | 2.6  | 0.5  |
| AT4G23180 | cysteine-rich receptor-like protein kinase 10                        | 0.2  | 2.4 | 1.8  | 0.2  | 0.4  | 2.9  | 1.5  | 0.7  |
| AT4G23190 |                                                                      | 1.7  | 2.6 | 1.4  | 0.9  | 1.6  | 3.0  | 3.1  | 1.9  |
| AT4G23260 | cysteine-rich receptor-like protein kinase 18                        | 1.7  | 3.6 | 2.6  | 0.2  | 0.4  | 2.0  | 1.2  | 0.6  |
| AT4G25200 | small heat shock protein 23.6                                        | 0.2  | 2.5 | -0.6 | -0.4 | 0.7  | 3.5  | -0.1 | 3.5  |
| AT4G27670 | heat shock protein 21                                                | 0.7  | 3.8 | 1.0  | -0.4 | 0.0  | 1.4  | 0.2  | 0.3  |
| AT4G33050 | calmodulin-binding protein                                           | 1.1  | 2.3 | 1.6  | 0.9  | 1.4  | 3.2  | 4.0  | 1.6  |
| AT4G33870 | putative peroxidase                                                  | 2.2  | 2.8 | 0.6  | -0.2 | 0.2  | 0.8  | 0.0  | -0.6 |
| AT4G34410 | ethylene-responsive transcription factor ERF109                      | 2.6  | 2.3 | 1.8  | 1.2  | 0.2  | 2.3  | 1.3  | 1.5  |
| AT4G35070 | SBP (S-ribonuclease binding protein) family protein                  | 0.6  | 2.1 | 1.1  | -0.1 | 0.0  | 0.3  | 0.7  | 0.2  |
| AT4G38410 | putative dehydrin                                                    | 1.6  | 2.2 | 1.8  | -0.3 | 1.4  | 0.9  | 0.0  | 1.1  |
| AT4G39830 | putative L-ascorbate oxidase                                         | -0.1 | 2.2 | 1.1  | -0.2 | 0.1  | 2.2  | 1.0  | 0.5  |
| AT5G05220 | hypothetical protein                                                 | 1.6  | 3.5 | 1.7  | 0.3  | -0.1 | 0.8  | 0.1  | 0.1  |
| AT5G12020 | class II heat shock protein 17.6                                     | 1.8  | 4.7 | 1.7  | -0.2 | 0.2  | 2.5  | 0.7  | 3.0  |
| AT5G12030 | heat shock protein 17.6A                                             | 1.8  | 4.5 | 0.9  | -1.5 | 0.1  | 2.1  | 0.8  | 2.6  |
| AT5G17970 | TIR-NBS-LRR class disease resistance protein                         | 2.3  | 3.2 | 0.7  | 0.0  | 0.0  | 1.3  | 0.3  | 0.5  |
| AT5G25250 | Flotillin-like protein 1                                             | 1.5  | 2.4 | 1.8  | 0.6  | 0.1  | 1.6  | 1.2  | 0.6  |
| AT5G37490 | U-box domain-containing protein 21                                   | 0.5  | 2.1 | 0.3  | 0.8  | 0.2  | 1.9  | 2.3  | 1.2  |
| AT5G39220 | hydrolase, alpha/beta fold family protein                            | 2.0  | 3.2 | 2.6  | 0.1  | 0.6  | 1.4  | 0.6  | -0.3 |
| AT5G39580 | peroxidase 62                                                        | 1.5  | 2.6 | 1.4  | 0.2  | 1.3  | 3.3  | 5.3  | 2.8  |
| AT5G41740 | TIR-NBS-LRR class disease resistance protein                         | 1.3  | 2.1 | 1.7  | 0.6  | 0.4  | 1.9  | 2.1  | 1.4  |
| AT5G42530 | hypothetical protein                                                 | 0.6  | 2.2 | 2.1  | -0.3 | 0.2  | -0.2 | 0.5  | 0.2  |
| AT5G43450 | 1-aminocyclopropane-1-carboxylate oxidase-like protein               | -2.2 | 2.1 | -1.6 | -0.1 | 0.0  | 2.2  | 1.5  | 2.0  |
| AT5G44820 | Nucleotide-diphospho-sugar transferase family protein                | 0.0  | 1.9 | 1.0  | -0.5 | 0.2  | 2.9  | 1.7  | 0.7  |
| AT5G45090 | protein PHLOEM PROTEIN 2-LIKE A7                                     | -1.7 | 2.2 | 1.6  | 0.7  | -2.0 | 1.7  | 1.1  | 1.1  |
| AT5G48700 | putative small ubiquitin-related modifier 6                          | -2.0 | 2.2 | 2.3  | -0.7 | -0.1 | 0.1  | 0.2  | 0.0  |
| AT5G48850 | protein SULPHUR DEFICIENCY-INDUCED 1                                 | 0.7  | 2.7 | 0.6  | -0.1 | 2.1  | 3.4  | 1.3  | -0.7 |
| AT5G52810 | NAD(P)-binding Rossmann-fold superfamily protein                     | 0.9  | 2.2 | 1.2  | 0.4  | 1.1  | 2.3  | 0.0  | 0.5  |

|           |                                |     |     |      |     |     |     |     |     |
|-----------|--------------------------------|-----|-----|------|-----|-----|-----|-----|-----|
| AT5G59580 |                                | 2.2 | 2.5 | 2.1  | 0.1 | 1.4 | 1.8 | 1.0 | 1.0 |
| AT5G59720 | heat shock protein 18.2        | 0.9 | 2.7 | -1.0 | 0.0 | 0.1 | 2.3 | 0.0 | 0.3 |
| AT5G67340 | ARM repeat superfamily protein | 1.6 | 2.5 | 1.8  | 0.4 | 2.2 | 4.2 | 3.9 | 1.6 |

Averaged values of fold change in three microarray replicates were shown.
