# Supplementary material
Source: publisher figshare collection journal article supplement (https://tandf.figshare.com/articles/dataset/_/6741470)
Supplement: Supplementary file 3 [file 1 › tssp_a_1454253_sm3290.pdf]

**Supplementary Table S3. Specifically expressed genes under mild Cu stress**

| Gene ID   | Description                                           | Average log <sub>2</sub> FC value under mild |      |     |      | Average log <sub>2</sub> FC value under |      |      |      |
|-----------|-------------------------------------------------------|----------------------------------------------|------|-----|------|-----------------------------------------|------|------|------|
|           |                                                       | Al                                           | Cd   | Cu  | Na   | Al                                      | Cd   | Cu   | Na   |
| AT1G04580 | aldehyde oxidase 4                                    | 0.9                                          | -0.8 | 2.8 | -0.4 | -0.1                                    | 0.1  | 0.0  | -0.1 |
| AT1G05800 | galactolipase DONGLE                                  | 0.9                                          | 1.1  | 2.7 | 0.2  | 0.4                                     | 2.5  | 3.5  | 0.9  |
| AT1G06160 | ethylene-responsive transcription factor ERF094       | 2.2                                          | 1.9  | 4.9 | -0.8 | 0.1                                     | 2.3  | 2.1  | 0.2  |
| AT1G09500 | alcohol dehydrogenase-like protein                    | -0.3                                         | -0.1 | 2.1 | -0.2 | 0.7                                     | 0.2  | 1.2  | 0.6  |
| AT1G15125 | S-adenosyl-L-methionine-dependent methyltransferase   | 0.8                                          | 0.2  | 2.4 | 0.0  | -0.2                                    | -0.1 | 0.2  | -0.1 |
| AT1G15415 | phosphatase 2A B'gamma subunit                        | 1.3                                          | 1.1  | 2.4 | 1.0  | 0.5                                     | 2.1  | 2.8  | 0.6  |
| AT1G15520 | ABC transporter G family member 40                    | 1.0                                          | 1.4  | 4.2 | 0.1  | 0.0                                     | 1.4  | 0.2  | 0.1  |
| AT1G17380 | protein TIFY 11A                                      | 1.4                                          | 0.2  | 2.5 | 0.1  | 1.8                                     | 3.0  | 4.2  | 2.5  |
| AT1G18520 | tetraspanin11                                         | 0.2                                          | 0.1  | 2.7 | -0.2 | -0.1                                    | 0.0  | 0.0  | 0.0  |
| AT1G18710 | myb domain protein 47                                 | 2.0                                          | 1.9  | 3.1 | 1.1  | 0.4                                     | 1.3  | -0.2 | 1.2  |
| AT1G19530 | hypothetical protein                                  | 1.0                                          | 1.7  | 5.2 | 0.0  | -0.1                                    | 0.5  | 4.3  | 0.3  |
| AT1G19670 | chlorophyllase 1                                      | 1.5                                          | 0.9  | 5.4 | 0.7  | 0.0                                     | 0.2  | 2.2  | 0.0  |
| AT1G26700 | MLO-like protein 14                                   | -1.3                                         | 1.6  | 2.5 | -1.1 | 0.1                                     | 0.0  | 0.4  | -0.1 |
| AT1G28370 | ethylene-responsive transcription factor 11           | 0.8                                          | 1.7  | 2.9 | -0.5 | 0.2                                     | 2.2  | 1.7  | 1.5  |
| AT1G28480 | glutaredoxin-GRX480                                   | 2.0                                          | 1.8  | 2.7 | 0.5  | 2.7                                     | 3.5  | 3.8  | 3.6  |
| AT1G32350 | alternative oxidase 1D                                | 1.8                                          | 1.3  | 2.3 | 0.2  | 0.9                                     | 2.6  | 2.9  | 0.9  |
| AT1G32960 | Subtilase family protein SBT3.3                       | 2.1                                          | 1.6  | 4.0 | -0.5 | 0.4                                     | 1.0  | 1.5  | 0.3  |
| AT1G35200 |                                                       | 1.7                                          | 0.2  | 2.8 | 1.7  | 0.0                                     | 0.2  | 0.5  | 0.5  |
| AT1G52120 | jacalin-like lectin domain-containing protein         | -1.5                                         | 2.1  | 2.9 | -0.7 | 1.7                                     | 1.9  | 0.1  | 0.0  |
| AT1G52400 | beta glucosidase 18                                   | 0.6                                          | 1.6  | 4.3 | 0.3  | 0.7                                     | 1.2  | 3.5  | 1.4  |
| AT1G52900 | Toll-Interleukin-Resistance domain-containing protein | 0.9                                          | 0.7  | 3.3 | -0.4 | 0.0                                     | 1.1  | 1.1  | 0.0  |
| AT1G61820 | beta glucosidase 46                                   | 2.0                                          | 1.0  | 2.3 | -0.3 | 1.6                                     | 3.0  | 5.8  | 1.3  |
| AT1G63990 | meiotic recombination protein SPO11-2                 | 1.0                                          | 0.7  | 3.5 | 0.1  | 0.1                                     | 0.0  | 0.3  | -0.2 |
| AT1G65890 | acyl activating enzyme 12                             | 0.3                                          | -0.2 | 2.9 | 0.0  | -0.2                                    | 0.2  | 0.5  | 0.3  |
| AT1G66040 | putative E3 ubiquitin-protein ligase ORTHRUS 4        | 0.9                                          | 0.7  | 2.4 | -0.1 | 0.4                                     | 0.6  | 2.0  | -0.3 |
| AT1G67000 | probable receptor-like protein kinase                 | 0.0                                          | 1.8  | 3.3 | 0.6  | 0.1                                     | 3.2  | 2.4  | 0.6  |
| AT1G69150 | cysteine/histidine-rich C1 domain-containing protein  | 0.7                                          | 1.1  | 2.2 | 0.1  | -0.3                                    | 1.7  | 0.2  | 0.2  |
| AT1G69930 | glutathione S-transferase TAU 11                      | 2.0                                          | 2.3  | 3.1 | 0.5  | 2.1                                     | 4.0  | 5.1  | 1.9  |
| AT1G71695 | peroxidase 12                                         | 0.1                                          | 0.7  | 2.4 | -0.4 | 0.0                                     | 2.3  | 1.8  | -0.4 |
| AT1G72520 | lipxygenase 4                                         | 0.8                                          | 1.3  | 2.3 | 0.4  | 0.1                                     | 0.6  | 1.2  | 0.2  |
| AT1G75040 | pathogenesis-related protein 5                        | 0.3                                          | 0.7  | 3.0 | -0.1 | 0.4                                     | 2.8  | 0.8  | 0.7  |
| AT1G76410 | RING-H2 finger protein ATL8                           | 1.4                                          | 0.3  | 3.3 | -0.5 | 0.6                                     | 1.9  | 2.7  | 0.4  |
| AT1G76640 | calcium-binding protein CML39                         | 2.3                                          | 0.9  | 3.1 | 0.2  | 1.6                                     | 2.0  | 2.4  | 1.7  |
| AT1G80840 | putative WRKY transcription factor 40                 | 0.7                                          | 2.0  | 3.4 | 0.6  | 1.1                                     | 3.9  | 4.0  | 2.8  |
| AT2G16660 | Major facilitator superfamily protein                 | 2.0                                          | 1.4  | 2.5 | 0.2  | 1.0                                     | 1.9  | 3.3  | 1.4  |
| AT2G17330 |                                                       | 0.3                                          | -0.8 | 2.2 | 0.3  | -0.2                                    | -0.2 | 0.0  | -0.1 |
| AT2G22760 |                                                       | 0.9                                          | 0.1  | 2.9 | 0.0  | 0.8                                     | 2.8  | 4.9  | 2.1  |
| AT2G22860 | phytosulfokine-beta                                   | 0.6                                          | 1.5  | 3.8 | -0.3 | 0.6                                     | 4.3  | 3.8  | 2.2  |
| AT2G31180 | myb domain protein 14                                 | 0.2                                          | 0.9  | 2.7 | 0.3  | 0.0                                     | 0.7  | 1.0  | 0.4  |
| AT2G31230 | ethylene-responsive transcription factor 15           | 1.1                                          | 1.0  | 2.9 | 0.1  | 0.0                                     | 1.7  | 1.9  | 0.2  |
| AT2G39030 | L-ornithine N5-acetyltransferase NATA1                | 0.2                                          | 0.1  | 4.0 | -0.4 | 0.0                                     | 0.5  | 5.5  | -0.3 |
| AT2G41180 | VQ motif-containing protein                           | 1.2                                          | 2.1  | 3.6 | 1.1  | 0.0                                     | 1.3  | 0.2  | 0.0  |
| AT2G41810 | hypothetical protein                                  | -0.2                                         | 0.9  | 3.4 | 0.3  | 0.0                                     | 2.5  | 1.4  | 0.5  |
| AT2G43920 | putative thiol methyltransferase 1                    | 0.7                                          | 0.8  | 3.2 | 0.1  | 1.8                                     | 3.1  | 1.7  | 0.0  |
| AT2G44070 | NagB/RpiA/CoA transferase-like superfamily protein    | -0.2                                         | 1.5  | 4.2 | -0.5 | 0.3                                     | 0.8  | 1.4  | 0.5  |
| AT2G44790 | uclacyanin 2                                          | 1.5                                          | 1.3  | 2.1 | 0.3  | 1.1                                     | 1.6  | 2.8  | 0.5  |
| AT2G47780 | Rubber elongation factor protein                      | -0.6                                         | -0.6 | 2.4 | 0.0  | 0.2                                     | 0.5  | 0.2  | 0.1  |
| AT2G47950 | hypothetical protein                                  | 1.0                                          | 0.5  | 2.5 | 0.3  | 0.0                                     | 0.2  | 0.2  | 0.1  |
| AT3G01970 | WRKY DNA-binding protein 45                           | 2.2                                          | 1.6  | 2.5 | -0.2 | 0.6                                     | 1.6  | 2.1  | 0.2  |
| AT3G04000 | aldehyde reductase                                    | 0.8                                          | 0.7  | 2.5 | 0.0  | 0.1                                     | 0.6  | 0.5  | 0.1  |
| AT3G04330 | Kunitz family trypsin and protease inhibitor protein  | -0.2                                         | 0.9  | 2.2 | 0.3  | -1.4                                    | -1.9 | -0.2 | -0.4 |
| AT3G04720 | pathogenesis-related 4                                | 1.9                                          | 1.2  | 4.1 | 0.2  | 1.4                                     | 4.1  | 4.9  | 1.6  |
| AT3G13640 | ABC transporter E family member 1                     | 2.2                                          | 1.7  | 2.5 | 0.9  | 0.3                                     | 1.5  | 2.3  | 0.3  |
| AT3G17690 | cyclic nucleotide gated channel 19                    | 2.1                                          | 1.4  | 2.6 | 0.9  | 1.4                                     | 2.8  | 2.7  | 2.3  |

|           |                                                         |      |      |     |      |      |      |      |      |
|-----------|---------------------------------------------------------|------|------|-----|------|------|------|------|------|
| AT3G19550 | hypothetical protein                                    | 0.3  | 0.3  | 3.8 | 0.1  | 0.1  | 1.0  | 2.1  | 1.5  |
| AT3G19690 | putative pathogenesis-related protein                   | 0.2  | 0.9  | 4.3 | -0.1 | -0.6 | 1.3  | 1.9  | -0.4 |
| AT3G19700 | leucine rich repeat kinase HAIKU 2                      | -0.2 | 2.0  | 2.4 | -0.9 | -0.1 | -0.1 | -0.1 | -0.3 |
| AT3G21040 |                                                         | 0.8  | -0.9 | 2.3 | 0.1  | -0.1 | 0.1  | 0.3  | -0.2 |
| AT3G22250 | UDP-glycosyltransferase 82A1                            | 1.7  | -0.8 | 2.8 | -0.7 | -0.2 | 0.4  | 3.0  | -0.5 |
| AT3G23550 | MATE efflux family protein LAL5                         | 0.6  | 1.2  | 3.5 | 0.3  | 0.0  | 1.4  | 2.2  | 0.5  |
| AT3G26830 | protein PHYTOALEXIN DEFICIENT 3                         | 0.8  | 1.6  | 2.7 | 0.7  | 1.4  | 4.1  | 3.6  | 2.2  |
| AT3G28380 | ABC transporter B family member 17                      | 0.9  | 2.0  | 3.5 | -0.1 | -0.1 | -0.1 | 0.2  | 0.1  |
| AT3G44460 | basic leucine zipper transcription factor 67            | 0.1  | 0.6  | 3.1 | -0.2 | -0.4 | 0.2  | 0.5  | -0.3 |
| AT3G46110 | hypothetical protein                                    | 1.2  | 2.0  | 2.2 | 0.2  | 1.6  | 4.4  | 3.9  | 1.9  |
| AT3G49110 | peroxidase 33                                           | 0.1  | 0.7  | 2.7 | 0.5  | -0.3 | 1.5  | 2.5  | 0.5  |
| AT3G49620 | 2-oxoacid-dependent dioxygenase-like protein DIN11      | -0.9 | 1.5  | 6.6 | 1.4  | -0.2 | 5.7  | 5.4  | 4.3  |
| AT3G51810 | Em-like protein GEA1                                    | 0.8  | 0.6  | 3.6 | 0.5  | -0.6 | 0.3  | 0.3  | 0.7  |
| AT3G53200 | myb domain protein 27                                   | 1.2  | 1.6  | 3.0 | -1.3 | 0.3  | 0.2  | 0.7  | -0.3 |
| AT3G55840 | Hs1pro-1 protein                                        | 1.5  | 1.2  | 2.2 | 0.1  | 1.0  | 2.7  | 3.7  | 1.5  |
| AT3G57260 | beta 1,3-glucanase 2                                    | -0.2 | 1.0  | 5.2 | -0.8 | 0.0  | 3.0  | 1.3  | 2.2  |
| AT3G59450 | putative calcium-binding protein CML46                  | 0.9  | 1.5  | 3.2 | 0.3  | 0.1  | 0.8  | 0.9  | 0.2  |
| AT4G08770 | peroxidase 37                                           | 1.4  | 1.2  | 2.8 | 0.0  | 1.5  | 2.5  | 3.3  | 0.8  |
| AT4G08780 | peroxidase 38                                           | 2.1  | 0.7  | 2.4 | 0.0  | 1.6  | 2.2  | 2.2  | 0.6  |
| AT4G09690 | cysteine/histidine-rich C1 domain-containing protein    | 0.6  | 2.5  | 2.7 | 0.6  | 0.2  | 0.2  | 0.5  | -0.3 |
| AT4G13310 | cytochrome P450 71A20                                   | 1.1  | 0.7  | 3.2 | -0.3 | 1.4  | 2.5  | 1.8  | 0.9  |
| AT4G15280 | UDP-glucosyl transferase 71B5                           | 1.6  | 0.3  | 3.3 | 0.1  | 0.3  | 1.3  | 4.0  | 0.9  |
| AT4G15670 | monothiol glutaredoxin-S7                               | -0.9 | -0.1 | 2.4 | -0.3 | 0.0  | 0.1  | 0.4  | 0.1  |
| AT4G15690 | monothiol glutaredoxin-S5                               | -0.9 | 0.7  | 2.7 | -1.5 | -0.5 | 0.9  | 0.5  | -0.6 |
| AT4G15700 | monothiol glutaredoxin-S3                               | -1.4 | -0.5 | 3.6 | -0.5 | -0.4 | 0.1  | 0.6  | -1.3 |
| AT4G16000 | hypothetical protein                                    | -0.5 | -0.6 | 3.0 | -0.3 | -0.1 | 0.7  | 0.7  | 0.0  |
| AT4G17090 | beta-amylase                                            | 2.1  | 2.3  | 3.2 | -0.2 | 0.3  | 1.8  | 3.2  | 0.8  |
| AT4G19000 | INTERACTS WITH SPT6-like protein IWS2                   | -0.3 | 0.3  | 2.6 | 0.4  | -0.5 | -0.1 | 0.1  | -0.8 |
| AT4G23150 | cysteine-rich receptor-like protein kinase 7            | 0.7  | 0.5  | 2.5 | -0.4 | 0.5  | 2.6  | 0.6  | 0.7  |
| AT4G23170 | cysteine-rich receptor-like protein kinase 9            | 0.2  | 1.2  | 2.7 | -0.4 | 0.1  | 2.3  | 1.5  | 0.3  |
| AT4G23220 | cysteine-rich receptor-like protein kinase 14           | 0.3  | 2.4  | 4.8 | 0.7  | 0.0  | 1.3  | 0.2  | 0.2  |
| AT4G24350 | phosphorylase family protein                            | 1.7  | 0.9  | 5.4 | -0.6 | 0.3  | 1.5  | 2.7  | 0.4  |
| AT4G36670 | putative polyol transporter 6                           | -2.1 | -0.3 | 2.2 | -0.6 | -1.9 | 1.3  | 1.8  | 0.6  |
| AT5G05600 | oxidoreductase, 2OG-Fe(II) oxygenase family protein     | 2.0  | 1.2  | 3.0 | -0.4 | 1.5  | 2.4  | 3.2  | 1.0  |
| AT5G07310 | ethylene-responsive transcription factor ERF115         | 2.6  | 0.9  | 3.0 | 0.7  | 0.3  | 1.6  | 3.4  | 1.2  |
| AT5G16080 | carboxylesterase 17                                     | -0.3 | 0.4  | 2.5 | -0.1 | -0.1 | 1.3  | 1.5  | 0.8  |
| AT5G18470 | curculin-like (mannose-binding) lectin family protein   | 0.8  | 1.9  | 2.7 | -0.6 | 2.5  | 4.3  | 3.5  | 2.2  |
| AT5G19110 | Eukaryotic aspartyl protease family protein             | 1.3  | 0.4  | 3.0 | 0.1  | 1.3  | 2.9  | 4.5  | 2.7  |
| AT5G21960 | ethylene-responsive transcription factor ERF016         | 1.4  | 0.7  | 3.1 | 0.1  | -0.1 | 0.9  | 1.6  | 3.0  |
| AT5G23660 | bidirectional sugar transporter SWEET12                 | 1.0  | -0.5 | 3.6 | 0.8  | -1.0 | 0.1  | 1.3  | -0.8 |
| AT5G24420 | 6-phosphogluconolactonase 5                             | 0.3  | -0.7 | 4.3 | 0.2  | -0.1 | 0.3  | 0.6  | 0.0  |
| AT5G24540 | beta glucosidase 31                                     | 0.0  | 1.2  | 5.4 | -0.1 | 0.2  | 2.8  | 1.0  | 1.8  |
| AT5G26340 | sugar transport protein 13                              | 2.3  | 1.3  | 2.8 | 0.6  | 2.3  | 2.9  | 4.5  | 1.6  |
| AT5G28510 | beta glucosidase 24                                     | 1.8  | 0.7  | 4.1 | -1.1 | 1.8  | 4.4  | 5.3  | 1.9  |
| AT5G35735 | putative auxin-responsive protein                       | 1.1  | 1.4  | 2.3 | 0.2  | 1.2  | 4.1  | 4.3  | 1.8  |
| AT5G36000 | hypothetical protein                                    | 0.3  | 0.1  | 3.2 | 0.3  | 0.0  | 0.3  | 0.2  | 0.0  |
| AT5G38540 | Mannose-binding lectin superfamily protein              | 0.3  | 1.8  | 2.5 | 0.4  | 0.5  | 1.4  | 1.0  | -0.2 |
| AT5G38550 | jacalin lectin family protein                           | -0.4 | 1.4  | 2.3 | 0.1  | -0.2 | 0.7  | 0.2  | -0.2 |
| AT5G43410 | ethylene-responsive transcription factor ERF096         | -0.6 | -1.2 | 4.9 | 0.0  | 0.0  | 1.4  | 1.5  | 1.7  |
| AT5G44620 | cytochrome P450, family 706, subfamily A, polypeptide 3 | 1.3  | 1.5  | 2.2 | 0.8  | 1.2  | 3.5  | 3.7  | 1.5  |
| AT5G46370 | two-pore potassium channel 2                            | 1.1  | 1.7  | 2.9 | 0.1  | -1.2 | -1.8 | -0.6 | -1.0 |
| AT5G48390 | ZIP4-like protein                                       | 1.2  | 1.0  | 2.4 | -0.1 | 0.7  | 2.2  | 1.8  | 0.2  |

|           |                                                                       |     |     |     |      |      |     |     |      |
|-----------|-----------------------------------------------------------------------|-----|-----|-----|------|------|-----|-----|------|
| AT5G52400 | cytochrome P450, family 715, subfamily A, polypeptide 1               | 1.7 | 0.2 | 2.4 | -0.5 | 0.2  | 2.0 | 3.6 | 1.0  |
| AT5G59540 | oxidoreductase, 2OG-Fe(II) oxygenase family protein                   | 0.7 | 1.3 | 2.2 | -1.1 | 1.8  | 3.4 | 2.9 | 0.3  |
| AT5G61160 | anthocyanin 5-aromatic acyltransferase 1                              | 0.6 | 0.7 | 3.5 | 0.7  | -0.2 | 1.6 | 2.2 | 0.6  |
| AT5G61890 | ethylene-responsive transcription factor ERF114                       | 2.0 | 1.6 | 4.0 | 0.7  | 0.3  | 1.5 | 2.9 | 0.3  |
| AT5G63900 | Acyl-CoA N-acyltransferase with RING/FYVE/PHD-type zinc finger domain | 0.9 | 1.1 | 2.7 | -0.3 | -0.2 | 0.9 | 0.9 | 0.5  |
| AT5G64990 | RAB GTPase homolog H1A                                                | 1.7 | 1.9 | 2.9 | 0.1  | 0.3  | 2.1 | 1.5 | 0.1  |
| AT5G65140 |                                                                       | 1.8 | 1.3 | 2.3 | 0.7  | 1.7  | 1.9 | 0.6 | 1.0  |
| AT5G67080 | mitogen-activated protein kinase kinase kinase 19                     | 0.4 | 0.5 | 2.5 | 0.1  | 0.6  | 2.6 | 3.4 | -0.1 |

---

Averaged values of fold change in three microarray replicates were shown.
