# Supplementary material
Source: publisher figshare collection journal article supplement (https://tandf.figshare.com/articles/dataset/_/6741470)
Supplement: Supplementary file 3 [file 1 › tssp_a_1454253_sm3291.pdf]

**Supplementary Table S4. Specifically expressed genes under mild Na stress**

| Gene ID   | Description                                                                               | Average log <sub>2</sub> FC value under mild |      |      |     | Average log <sub>2</sub> FC value under |      |      |      |
|-----------|-------------------------------------------------------------------------------------------|----------------------------------------------|------|------|-----|-----------------------------------------|------|------|------|
|           |                                                                                           | Al                                           | Cd   | Cu   | Na  | Al                                      | Cd   | Cu   | Na   |
| AT1G02920 | glutathione S-transferase F7                                                              | -0.2                                         | 1.8  | 2.1  | 1.5 | 0.9                                     | 4.0  | 4.1  | 1.9  |
| AT1G07690 | hypothetical protein                                                                      | 0.0                                          | 1.0  | 1.7  | 1.5 | -1.1                                    | -1.3 | -0.7 | -1.3 |
| AT1G15330 | Cystathionine beta-synthase (CBS) protein                                                 | -1.2                                         | 0.2  | 0.8  | 2.0 | -0.5                                    | -0.3 | 1.2  | 0.1  |
| AT1G17615 | Disease resistance protein (TIR-NBS class)                                                | 1.7                                          | 1.0  | -0.5 | 1.5 | 0.5                                     | 0.4  | 0.5  | 0.1  |
| AT1G48590 | calcium-dependent lipid-binding family protein                                            | 0.6                                          | 0.6  | -0.5 | 1.9 | 0.0                                     | 0.4  | 0.3  | 0.3  |
| AT1G65800 | receptor-like serine/threonine-protein kinase SD1-6                                       | -0.2                                         | 0.3  | 0.5  | 1.3 | 0.2                                     | 1.2  | 0.2  | 0.5  |
| AT1G66700 | SABATH family methyltransferase PXMT1                                                     | 0.9                                          | 0.4  | 1.2  | 2.3 | 0.1                                     | 0.6  | 0.6  | 1.0  |
| AT1G75830 | PLANT DEFENSIN 1.1                                                                        | 0.3                                          | 0.1  | 0.2  | 1.8 | 0.0                                     | 0.4  | 0.5  | 0.1  |
| AT1G77910 | hypothetical protein                                                                      | -1.1                                         | -0.8 | -1.1 | 1.2 | -0.3                                    | 0.7  | -0.1 | 0.3  |
| AT1G78410 | VQ motif-containing protein                                                               | 1.0                                          | 1.0  | 1.3  | 1.2 | 1.7                                     | 2.7  | 1.8  | 1.7  |
| AT1G79130 | SAUR-like auxin-responsive protein                                                        | -2.7                                         | -2.5 | -2.0 | 1.3 | -0.1                                    | -0.4 | 0.1  | -0.2 |
| AT2G03460 | galactose oxidase/kelch-like protein                                                      | 0.0                                          | 0.3  | 0.5  | 1.4 | 0.0                                     | 0.2  | 0.2  | 0.1  |
| AT2G10940 | Bifunctional inhibitor/lipid-transfer protein/seed storage 2S albumin superfamily protein | -0.2                                         | 0.0  | -0.4 | 2.8 | -0.1                                    | 0.0  | 0.2  | -0.1 |
| AT2G29220 | putative inactive L-type lectin-domain containing receptor kinase III.1                   | 2.2                                          | 1.8  | -0.3 | 1.7 | 0.2                                     | -0.4 | 0.0  | 1.1  |
| AT2G33790 | arabinogalactan protein 30                                                                | -0.5                                         | -0.2 | 1.9  | 1.1 | -2.1                                    | -3.2 | -3.4 | -0.1 |
| AT3G05780 | lon protease 3                                                                            | -2.7                                         | -2.4 | -1.5 | 1.8 | -0.9                                    | -1.9 | -1.7 | -0.5 |
| AT3G05790 | lon protease 4                                                                            | -2.3                                         | -2.3 | -2.6 | 1.8 | 0.1                                     | 0.2  | -0.9 | 0.0  |
| AT4G05076 |                                                                                           | 0.5                                          | -0.4 | 0.0  | 1.0 | -0.1                                    | 0.3  | 0.2  | -0.1 |
| AT4G12170 | thioredoxin family protein                                                                | 0.0                                          | -0.5 | 0.9  | 1.5 | 0.1                                     | -0.3 | 0.5  | 0.4  |
| AT4G17980 | NAC domain containing protein 71                                                          | 2.0                                          | 1.9  | 1.0  | 2.0 | 0.4                                     | 0.2  | 0.4  | 0.2  |
| AT4G26200 | 1-aminocyclopropane-1-carboxylate synthase 7                                              | 0.3                                          | 1.7  | -0.8 | 1.4 | 1.1                                     | 3.5  | 1.7  | 3.1  |
| AT4G26260 | myo-inositol oxygenase 4                                                                  | -2.8                                         | 0.5  | 0.1  | 1.4 | -1.2                                    | -1.4 | 2.8  | -0.2 |
| AT4G27550 | putative alpha,alpha-trehalose-phosphate synthase [UDP-forming] 4                         | 0.1                                          | 0.6  | 0.1  | 1.3 | 0.2                                     | 0.9  | 0.1  | 0.4  |
| AT4G36850 | PQ-loop repeat family protein / transmembrane family protein                              | -5.7                                         | -6.8 | -6.0 | 1.3 | -1.0                                    | -2.9 | -2.8 | 0.3  |
| AT5G07610 | F-box protein                                                                             | 2.2                                          | 0.5  | 2.0  | 1.2 | 0.3                                     | 0.2  | 0.2  | 1.3  |
| AT5G11930 | Thioredoxin superfamily protein                                                           | 0.4                                          | -0.5 | -0.8 | 1.2 | 0.7                                     | 0.2  | -0.3 | 0.3  |
| AT5G22390 | hypothetical protein                                                                      | 0.3                                          | 0.2  | 0.4  | 1.8 | 0.0                                     | 0.0  | 0.0  | 1.1  |
| AT5G28470 | probable peptide/nitrate transporter                                                      | 2.0                                          | 1.3  | 1.1  | 1.8 | -0.1                                    | 0.0  | 0.1  | 0.0  |
| AT5G37730 | hypothetical protein                                                                      | 2.0                                          | 2.0  | -0.2 | 1.4 | 0.1                                     | 0.6  | 0.1  | -0.3 |
| AT5G57220 | cytochrome P450, family 81, subfamily F, polypeptide 2                                    | -0.7                                         | 1.1  | 0.6  | 1.5 | 0.2                                     | 3.5  | 3.8  | 2.7  |
| AT5G58780 | Z,E-mixed heptaprenyl diphosphate synthase                                                | 0.3                                          | -0.8 | -1.3 | 1.3 | -0.4                                    | -1.3 | -0.3 | -0.2 |
| AT5G61470 | C2H2-like zinc finger protein                                                             | -1.1                                         | 0.1  | -0.3 | 2.0 | -0.1                                    | 0.2  | -0.1 | -0.1 |
| AT5G65600 | concanavalin A-like lectin kinase-like protein                                            | 1.3                                          | 2.0  | 2.1  | 1.4 | 0.5                                     | 3.4  | 3.1  | 1.5  |

Averaged values of fold change in three microarray replicates were shown.
