# Supplementary material
Source: publisher figshare collection journal article supplement (https://tandf.figshare.com/articles/dataset/_/6741470)
Supplement: Supplementary file 3 [file 1 › tssp_a_1454253_sm3293.pdf]

**Supplementary Table S6. Enrichment analysis of MapMan pathways in genes upregulated by only Al stress under each of severe and mild stress intensity**

| Gene set           | Enriched Mapman pathway  | Normalized frequency | Standard deviation | p-value     |
|--------------------|--------------------------|----------------------|--------------------|-------------|
| Severe Al-specific | TCA / org transformation | 6.64                 | 4.486              | 0.033       |
|                    | metal handling           | 6.32                 | 4.048              | 0.036       |
|                    | secondary metabolism     | 4.13                 | 1.518              | 0.001297    |
|                    | misc                     | 3.3                  | 0.704              | 0.000001886 |
|                    | development              | 2.66                 | 0.795              | 0.007497    |
|                    | transport                | 2.57                 | 0.778              | 0.003935    |
|                    | hormone metabolism       | 2.42                 | 1.058              | 0.039       |
|                    | cell wall                | 2.39                 | 1.099              | 0.04        |
| Mild Al-specific   | TCA / org transformation | 7.08                 | 4.036              | 0.007999    |
|                    | transport                | 3.47                 | 0.747              | 0.000002061 |
|                    | development              | 2.36                 | 0.637              | 0.006687    |
|                    | misc                     | 2.11                 | 0.411              | 0.00136     |
|                    | signalling               | 1.91                 | 0.495              | 0.008539    |
|                    | stress                   | 1.82                 | 0.551              | 0.018       |

Analyzed by Classification SuperViewer with Bootstrap ([http://bar.utoronto.ca/ntools/cgi-bin/ntools\\_classification\\_superviewer.cgi](http://bar.utoronto.ca/ntools/cgi-bin/ntools_classification_superviewer.cgi)).
