# Supplementary material
Source: publisher figshare collection journal article supplement (https://tandf.figshare.com/articles/dataset/_/6741470)
Supplement: Supplementary file 3 [file 1 › tssp_a_1454253_sm3294.pdf]

**Supplementary Table S7. Enriched GO terms in upregulated genes by severe or mild Al stress**

| Gene group                               | Enriched GO-BP term                                     | Expected | Fold Enrichment | FDR       |
|------------------------------------------|---------------------------------------------------------|----------|-----------------|-----------|
| Upregulated genes<br>by severe Al stress | 2,4,6-trinitrotoluene catabolic process                 | 0.02     | 90.47           | 0.0421    |
|                                          | sulfate transmembrane transport                         | 0.07     | 45.23           | 0.00841   |
|                                          | toxin catabolic process                                 | 0.45     | 26.48           | 2.6E-10   |
|                                          | suberin biosynthetic process                            | 0.19     | 21.29           | 0.00629   |
|                                          | glutathione metabolic process                           | 0.61     | 19.74           | 2.92E-09  |
|                                          | defense response to bacterium, incompatible interaction | 0.35     | 16.96           | 0.000425  |
|                                          | hyperosmotic salinity response                          | 0.41     | 12.23           | 0.00762   |
|                                          | lateral root formation                                  | 0.33     | 12.06           | 0.0341    |
|                                          | response to oomycetes                                   | 0.34     | 11.67           | 0.0371    |
|                                          | leaf senescence                                         | 0.64     | 10.92           | 0.000777  |
|                                          | response to wounding                                    | 1.68     | 7.74            | 0.0000737 |
|                                          | response to oxidative stress                            | 3.27     | 6.72            | 2.88E-09  |
|                                          | response to salicylic acid                              | 1.5      | 6.65            | 0.000566  |
|                                          | response to jasmonic acid                               | 1.68     | 5.95            | 0.00127   |
|                                          | response to nitrogen compound                           | 2.32     | 3.88            | 0.0404    |
|                                          | cellular response to acid chemical                      | 3.43     | 3.79            | 0.00569   |
|                                          | response to metal ion                                   | 3.23     | 3.72            | 0.0112    |
|                                          | response to abscisic acid                               | 3.86     | 3.37            | 0.0149    |
|                                          | cellular response to oxygen-containing compound         | 4.33     | 3               | 0.0371    |
|                                          | oxidation-reduction process                             | 10.76    | 2.79            | 0.0000983 |
| Upregulated genes<br>by mild Al stress   | response to aluminum ion                                | 0.09     | 34.12           | 0.0278    |
|                                          | calcium ion transmembrane transport                     | 0.25     | 16.06           | 0.0268    |
|                                          | benzene-containing compound metabolic process           | 0.32     | 15.51           | 0.00699   |
|                                          | defense response to bacterium, incompatible interaction | 0.47     | 10.66           | 0.0245    |
|                                          | toxin catabolic process                                 | 0.6      | 9.99            | 0.0091    |
|                                          | glutathione metabolic process                           | 0.81     | 7.44            | 0.0286    |
|                                          | reactive oxygen species metabolic process               | 1.27     | 7.06            | 0.00265   |
|                                          | leaf senescence                                         | 0.85     | 7.06            | 0.0356    |
|                                          | cellular response to drug                               | 1        | 7.03            | 0.0146    |
|                                          | response to salicylic acid                              | 1.99     | 6.02            | 0.000577  |
|                                          | cofactor catabolic process                              | 1.2      | 5.83            | 0.0349    |
|                                          | response to oxidative stress                            | 4.34     | 4.84            | 0.0000634 |
|                                          | response to salt stress                                 | 4.97     | 3.22            | 0.0102    |
|                                          | oxidation-reduction process                             | 14.26    | 2.1             | 0.0262    |

Analyzed by PANTHER classification system (<http://www.pantherdb.org/>).

Only bottom level of significantly enriched GO terms were shown.
