# Supplementary material
Source: publisher figshare collection journal article supplement (https://tandf.figshare.com/articles/dataset/_/6741470)
Supplement: Supplementary file 3 [file 1 › tssp_a_1454253_sm3297.pdf]

**Supplementary Table S9. Enriched GO terms in overlapped genes between Cd and Cu ions**

| Gene group                      | Enriched GO-BP term                                         | Expected | Fold Enrichment | FDR        |
|---------------------------------|-------------------------------------------------------------|----------|-----------------|------------|
| Common in severe and mildstress | response to drug                                            | 0.92     | 8.68            | 0.00221    |
|                                 | plant organ senescence                                      | 0.15     | 26.64           | 0.00669    |
|                                 | hydrogen peroxide catabolic process                         | 0.16     | 24.56           | 0.0085     |
|                                 | response to oomycetes                                       | 0.08     | 38.02           | 0.0209     |
|                                 | response to bacterium                                       | 0.75     | 7.96            | 0.0269     |
|                                 | defense response, incompatible interaction                  | 0.28     | 14.42           | 0.0395     |
|                                 | toxin catabolic process                                     | 0.1      | 28.75           | 0.0415     |
|                                 | response to reactive oxygen species                         | 0.29     | 13.67           | 0.0446     |
| Only under severe stress        | response to wounding                                        | 0.52     | 17.32           | 0.00000154 |
|                                 | response to salicylic acid                                  | 0.46     | 17.21           | 0.00000949 |
|                                 | response to abscisic acid                                   | 1.19     | 9.22            | 0.000011   |
|                                 | response to jasmonic acid                                   | 0.52     | 15.4            | 0.0000161  |
|                                 | toxin catabolic process                                     | 0.14     | 35.68           | 0.0000864  |
|                                 | response to oxidative stress                                | 1.01     | 8.9             | 0.000163   |
|                                 | oxidation-reduction process                                 | 3.33     | 4.51            | 0.000182   |
|                                 | glutathione metabolic process                               | 0.19     | 26.6            | 0.000275   |
|                                 | response to inorganic substance                             | 1.94     | 5.15            | 0.00303    |
|                                 | defense response by callose deposition                      | 0.05     | 58.51           | 0.00317    |
|                                 | cellular response to hypoxia                                | 0.08     | 39.9            | 0.0081     |
|                                 | negative regulation of nucleic acid-templated transcription | 0.44     | 11.25           | 0.00907    |
|                                 | induced systemic resistance                                 | 0.09     | 35.11           | 0.00974    |
|                                 | response to fungus                                          | 1.49     | 5.36            | 0.0116     |
|                                 | defense response to virus                                   | 0.1      | 31.35           | 0.0126     |
|                                 | response to salt stress                                     | 1.16     | 6.04            | 0.0141     |
|                                 | defense response to bacterium, incompatible interaction     | 0.11     | 27.43           | 0.0171     |
|                                 | indole glucosinolate biosynthetic process                   | 0.02     | > 100           | 0.0174     |
|                                 | response to chitin                                          | 0.32     | 12.45           | 0.0233     |
|                                 | regulation of transcription, DNA-templated                  | 5.62     | 2.67            | 0.0283     |
|                                 | aging                                                       | 0.35     | 11.59           | 0.0284     |
|                                 | transcription, DNA-templated                                | 4.49     | 2.89            | 0.0296     |
|                                 | regulation of hormone levels                                | 1        | 5.99            | 0.0297     |
|                                 | regulation of response to stress                            | 0.65     | 7.74            | 0.03       |
|                                 | regulation of response to biotic stimulus                   | 0.17     | 17.91           | 0.0361     |
|                                 | response to ethylene                                        | 0.72     | 6.97            | 0.0401     |
|                                 | regulation of response to external stimulus                 | 0.18     | 16.56           | 0.0419     |
| Only under mild stress          | defense response to bacterium                               | 1.21     | 7.44            | 0.00621    |
|                                 | response to nitrogen compound                               | 1.11     | 7.18            | 0.0135     |
|                                 | response to oxygen-containing compound                      | 5.29     | 3.59            | 0.003      |
|                                 | response to acid chemical                                   | 4.11     | 3.41            | 0.0276     |
|                                 | oxidation-reduction process                                 | 5.17     | 3.1             | 0.0273     |

Analyzed by PANTHER classification system (<http://www.pantherdb.org/>).

Only bottom level of significantly enriched GO terms were shown.
