# Supplementary material
Source: publisher figshare collection journal article supplement (https://tandf.figshare.com/articles/dataset/_/6741470)

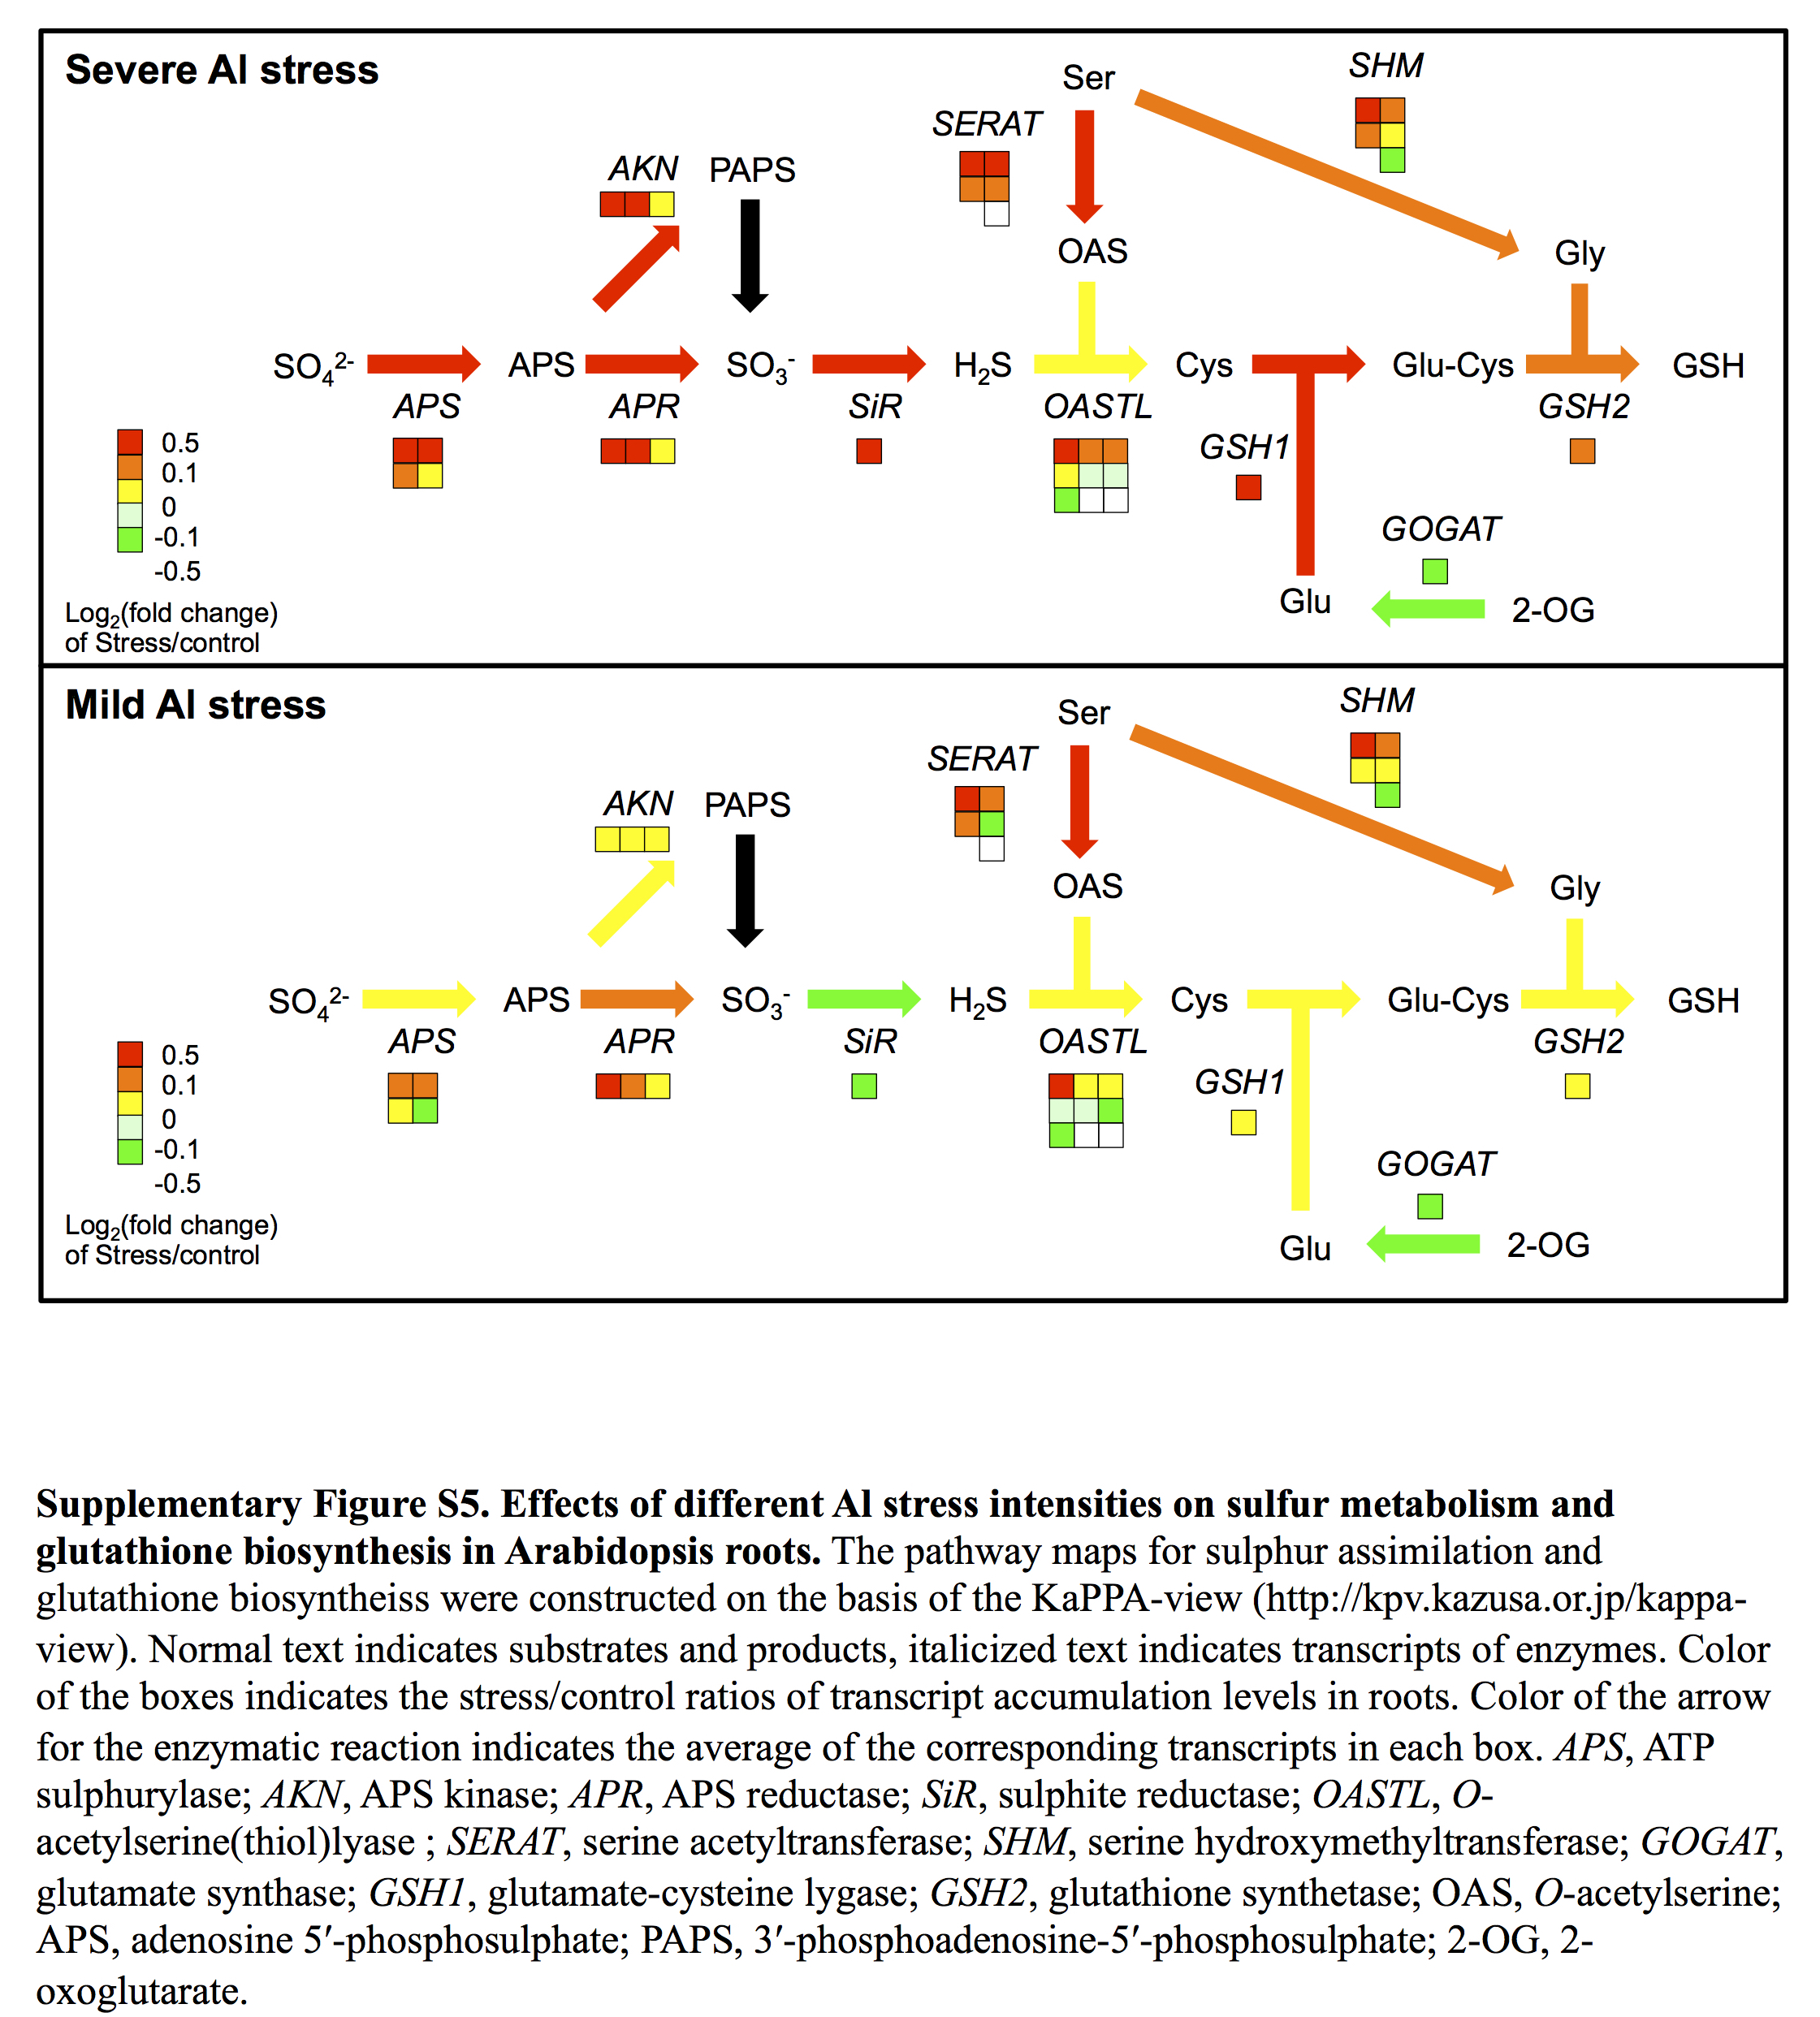

Supplement: Supplementary file 3 [file 1 › tssp_a_1454253_sm3287.jpg]

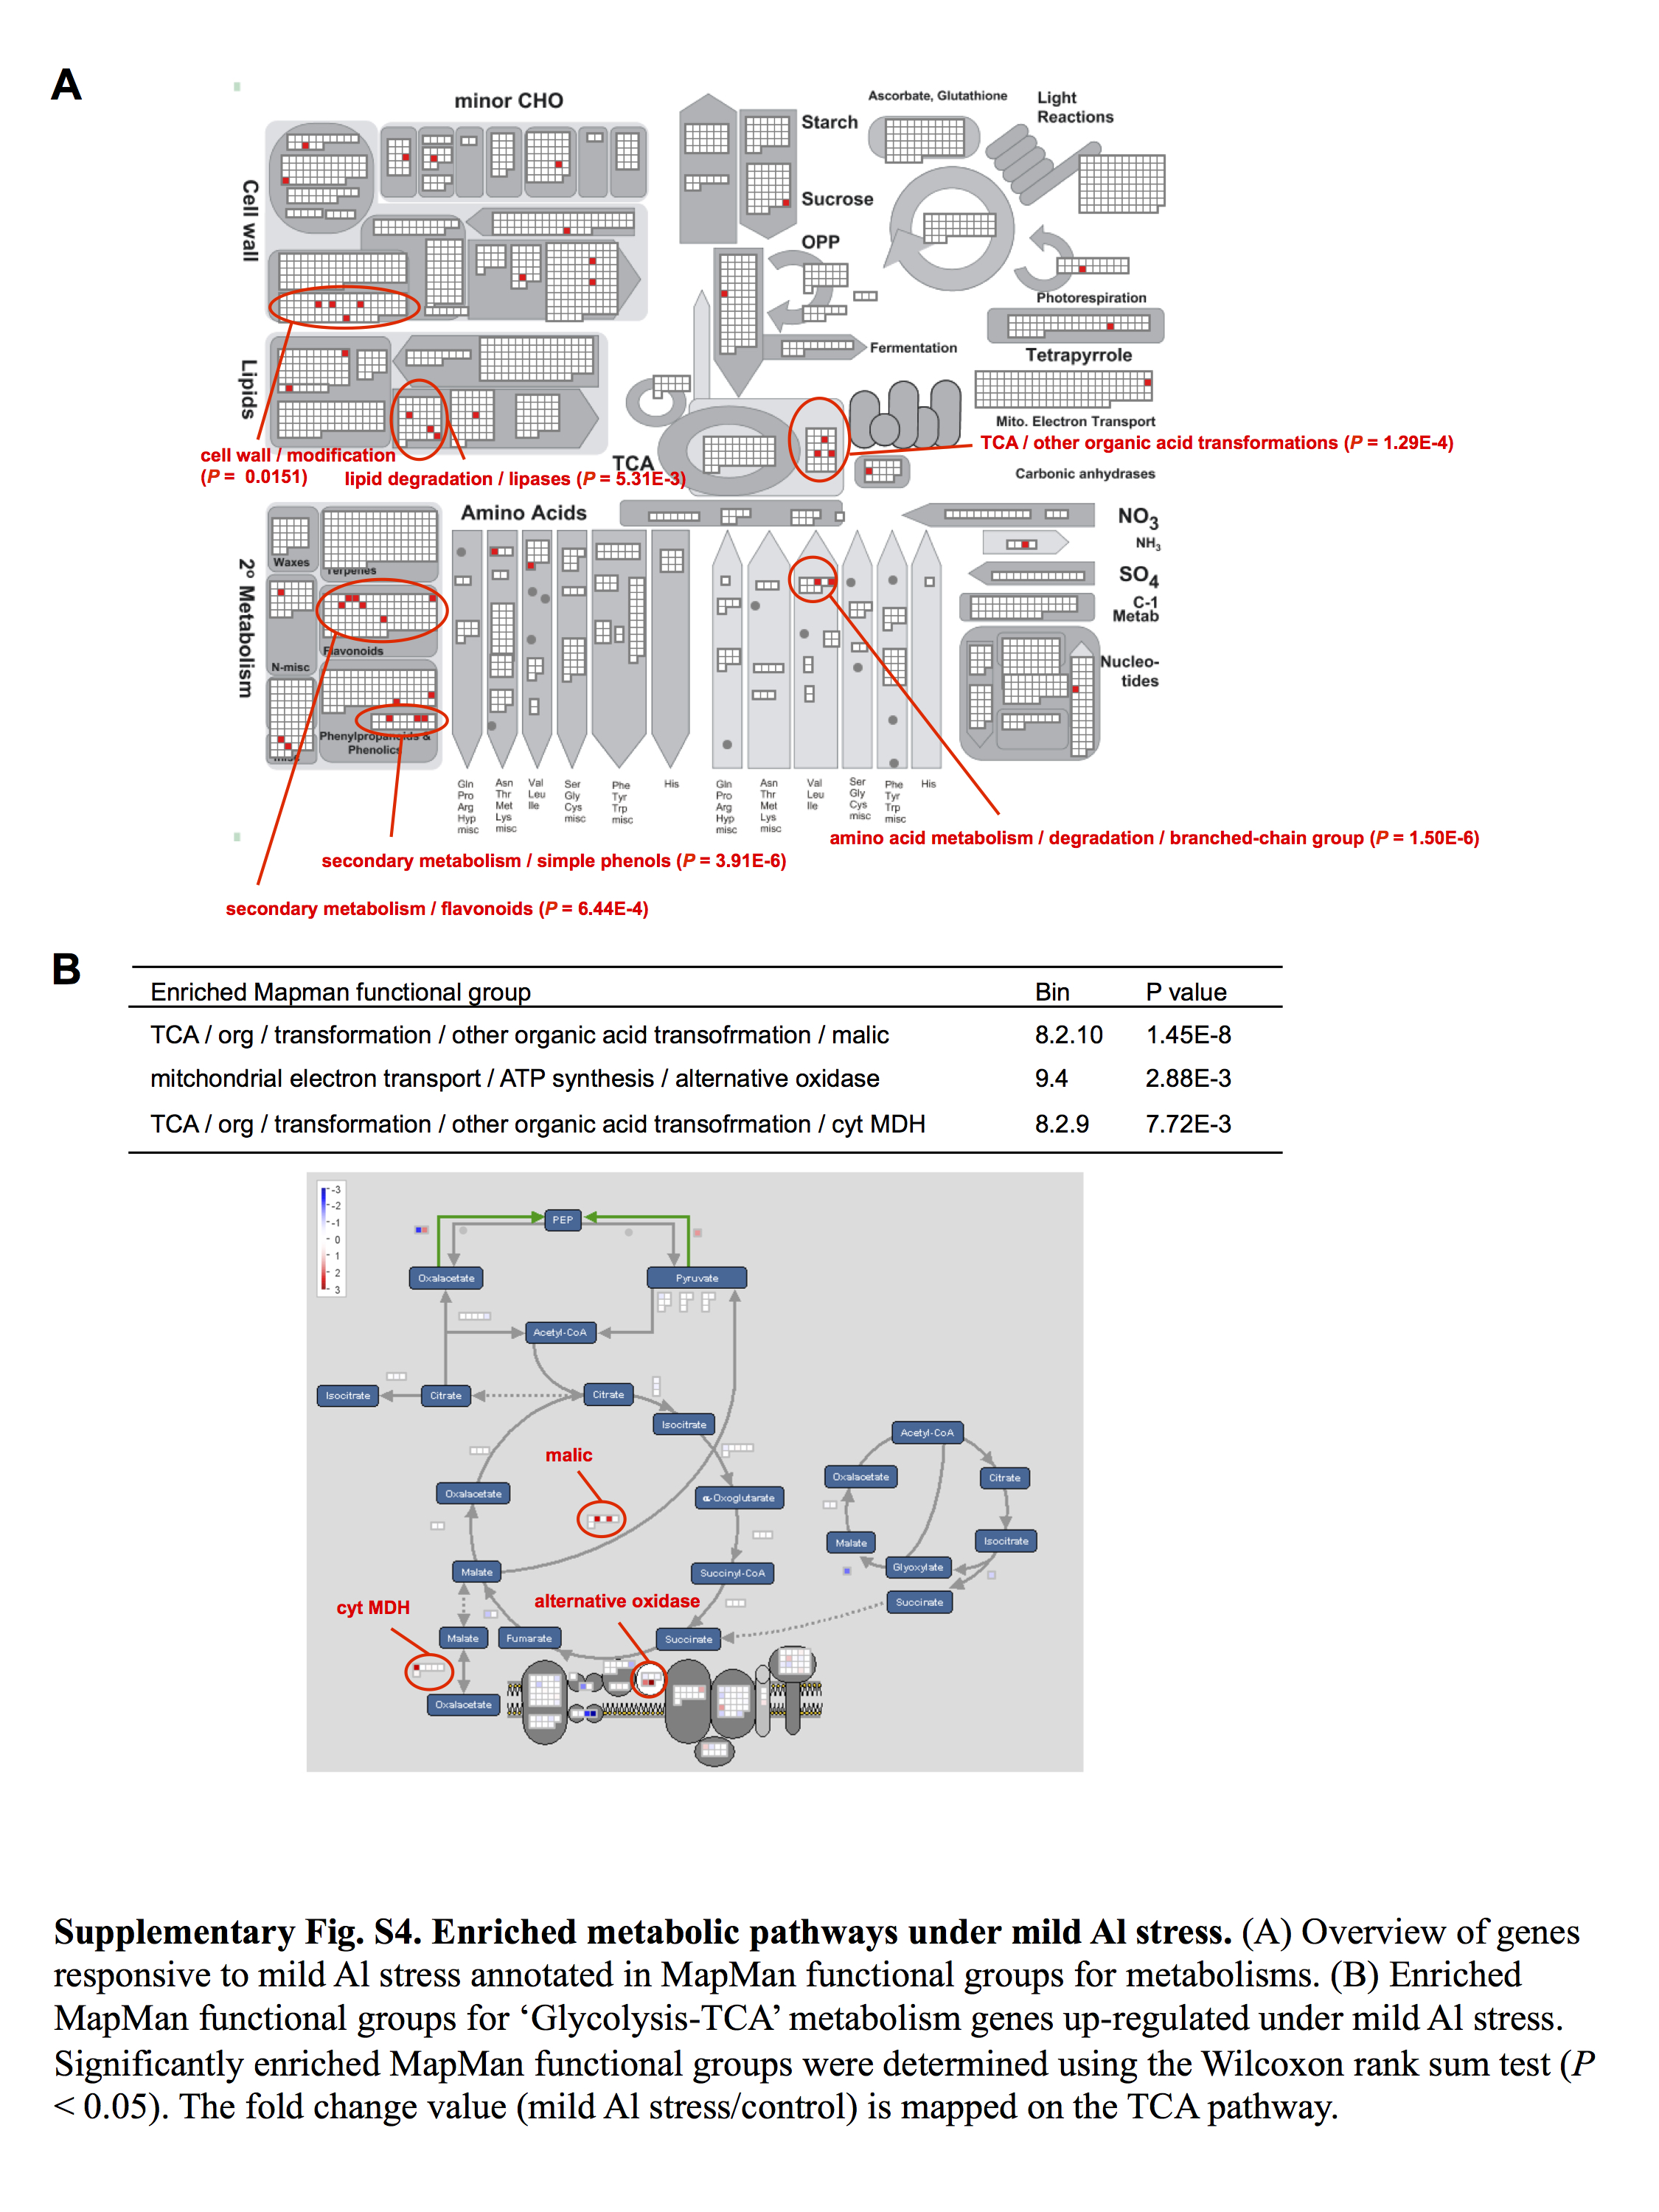

Supplement: Supplementary file 3 [file 1 › tssp_a_1454253_sm3286.jpg]

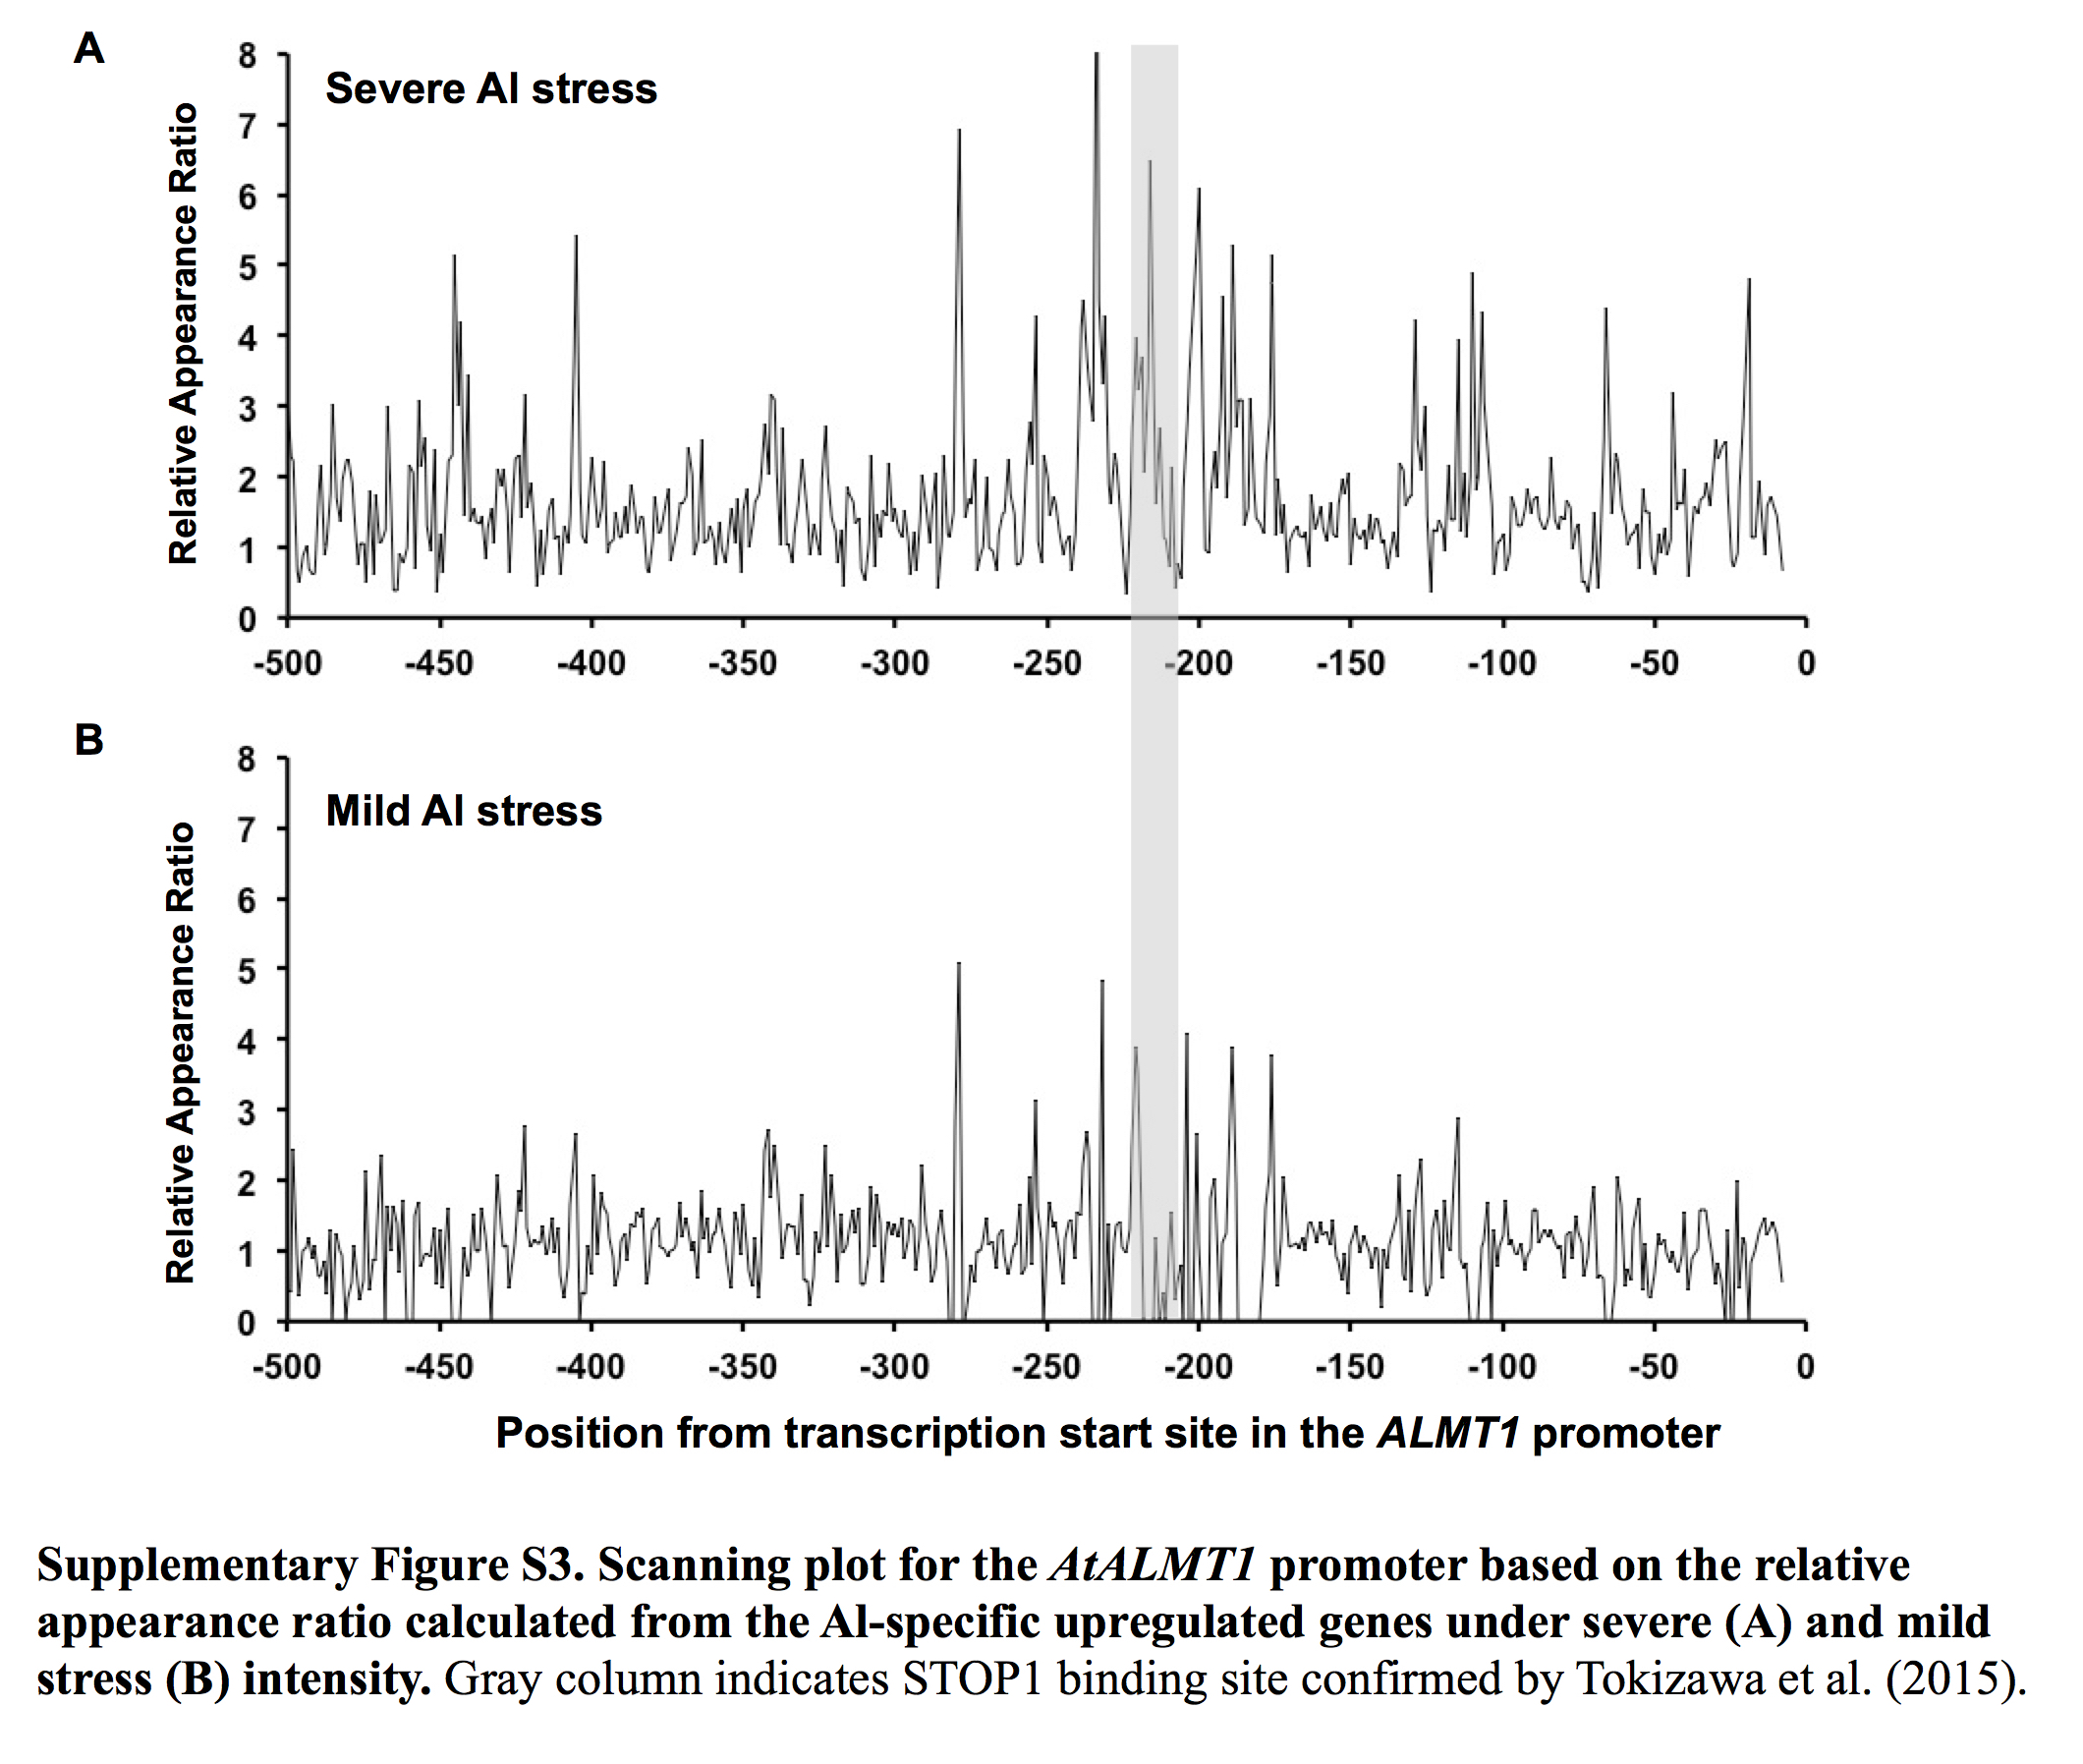

Supplement: Supplementary file 3 [file 1 › tssp_a_1454253_sm3284.jpg]

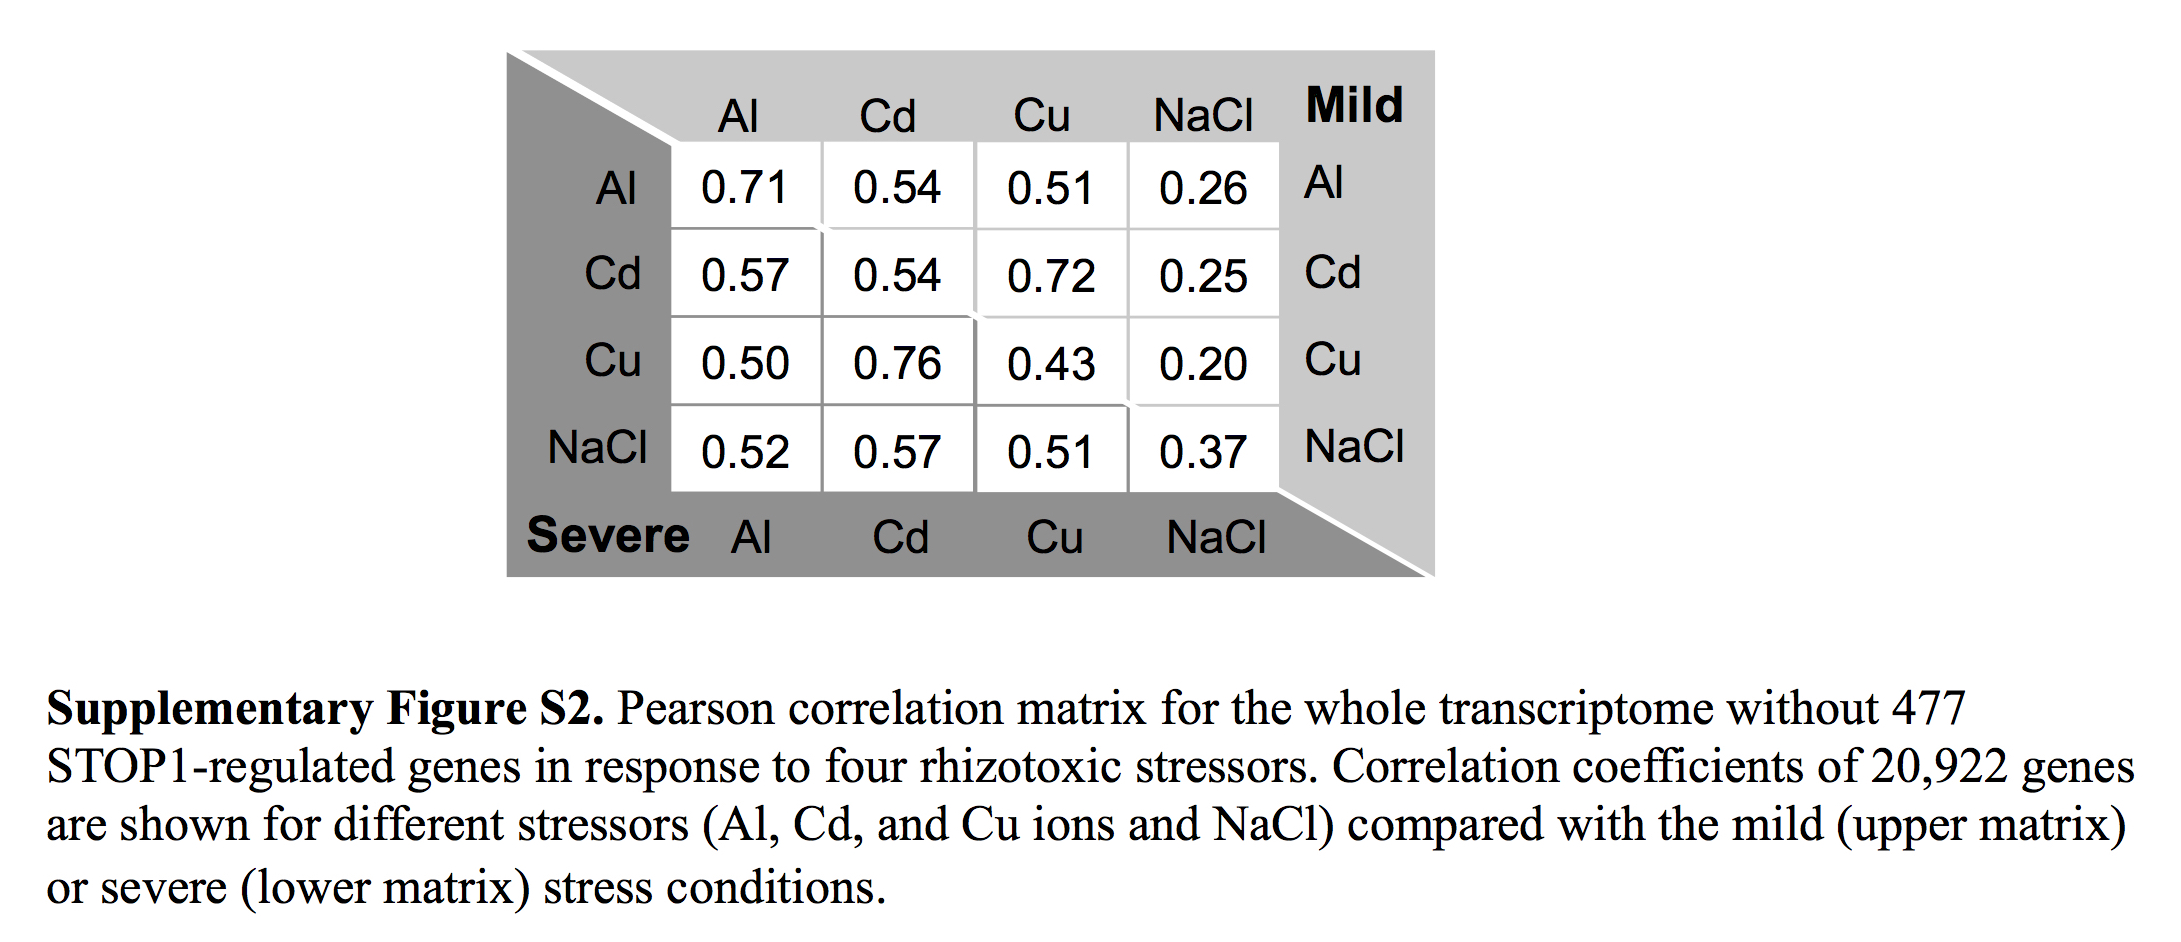

Supplement: Supplementary file 3 [file 1 › tssp_a_1454253_sm3282.jpg]

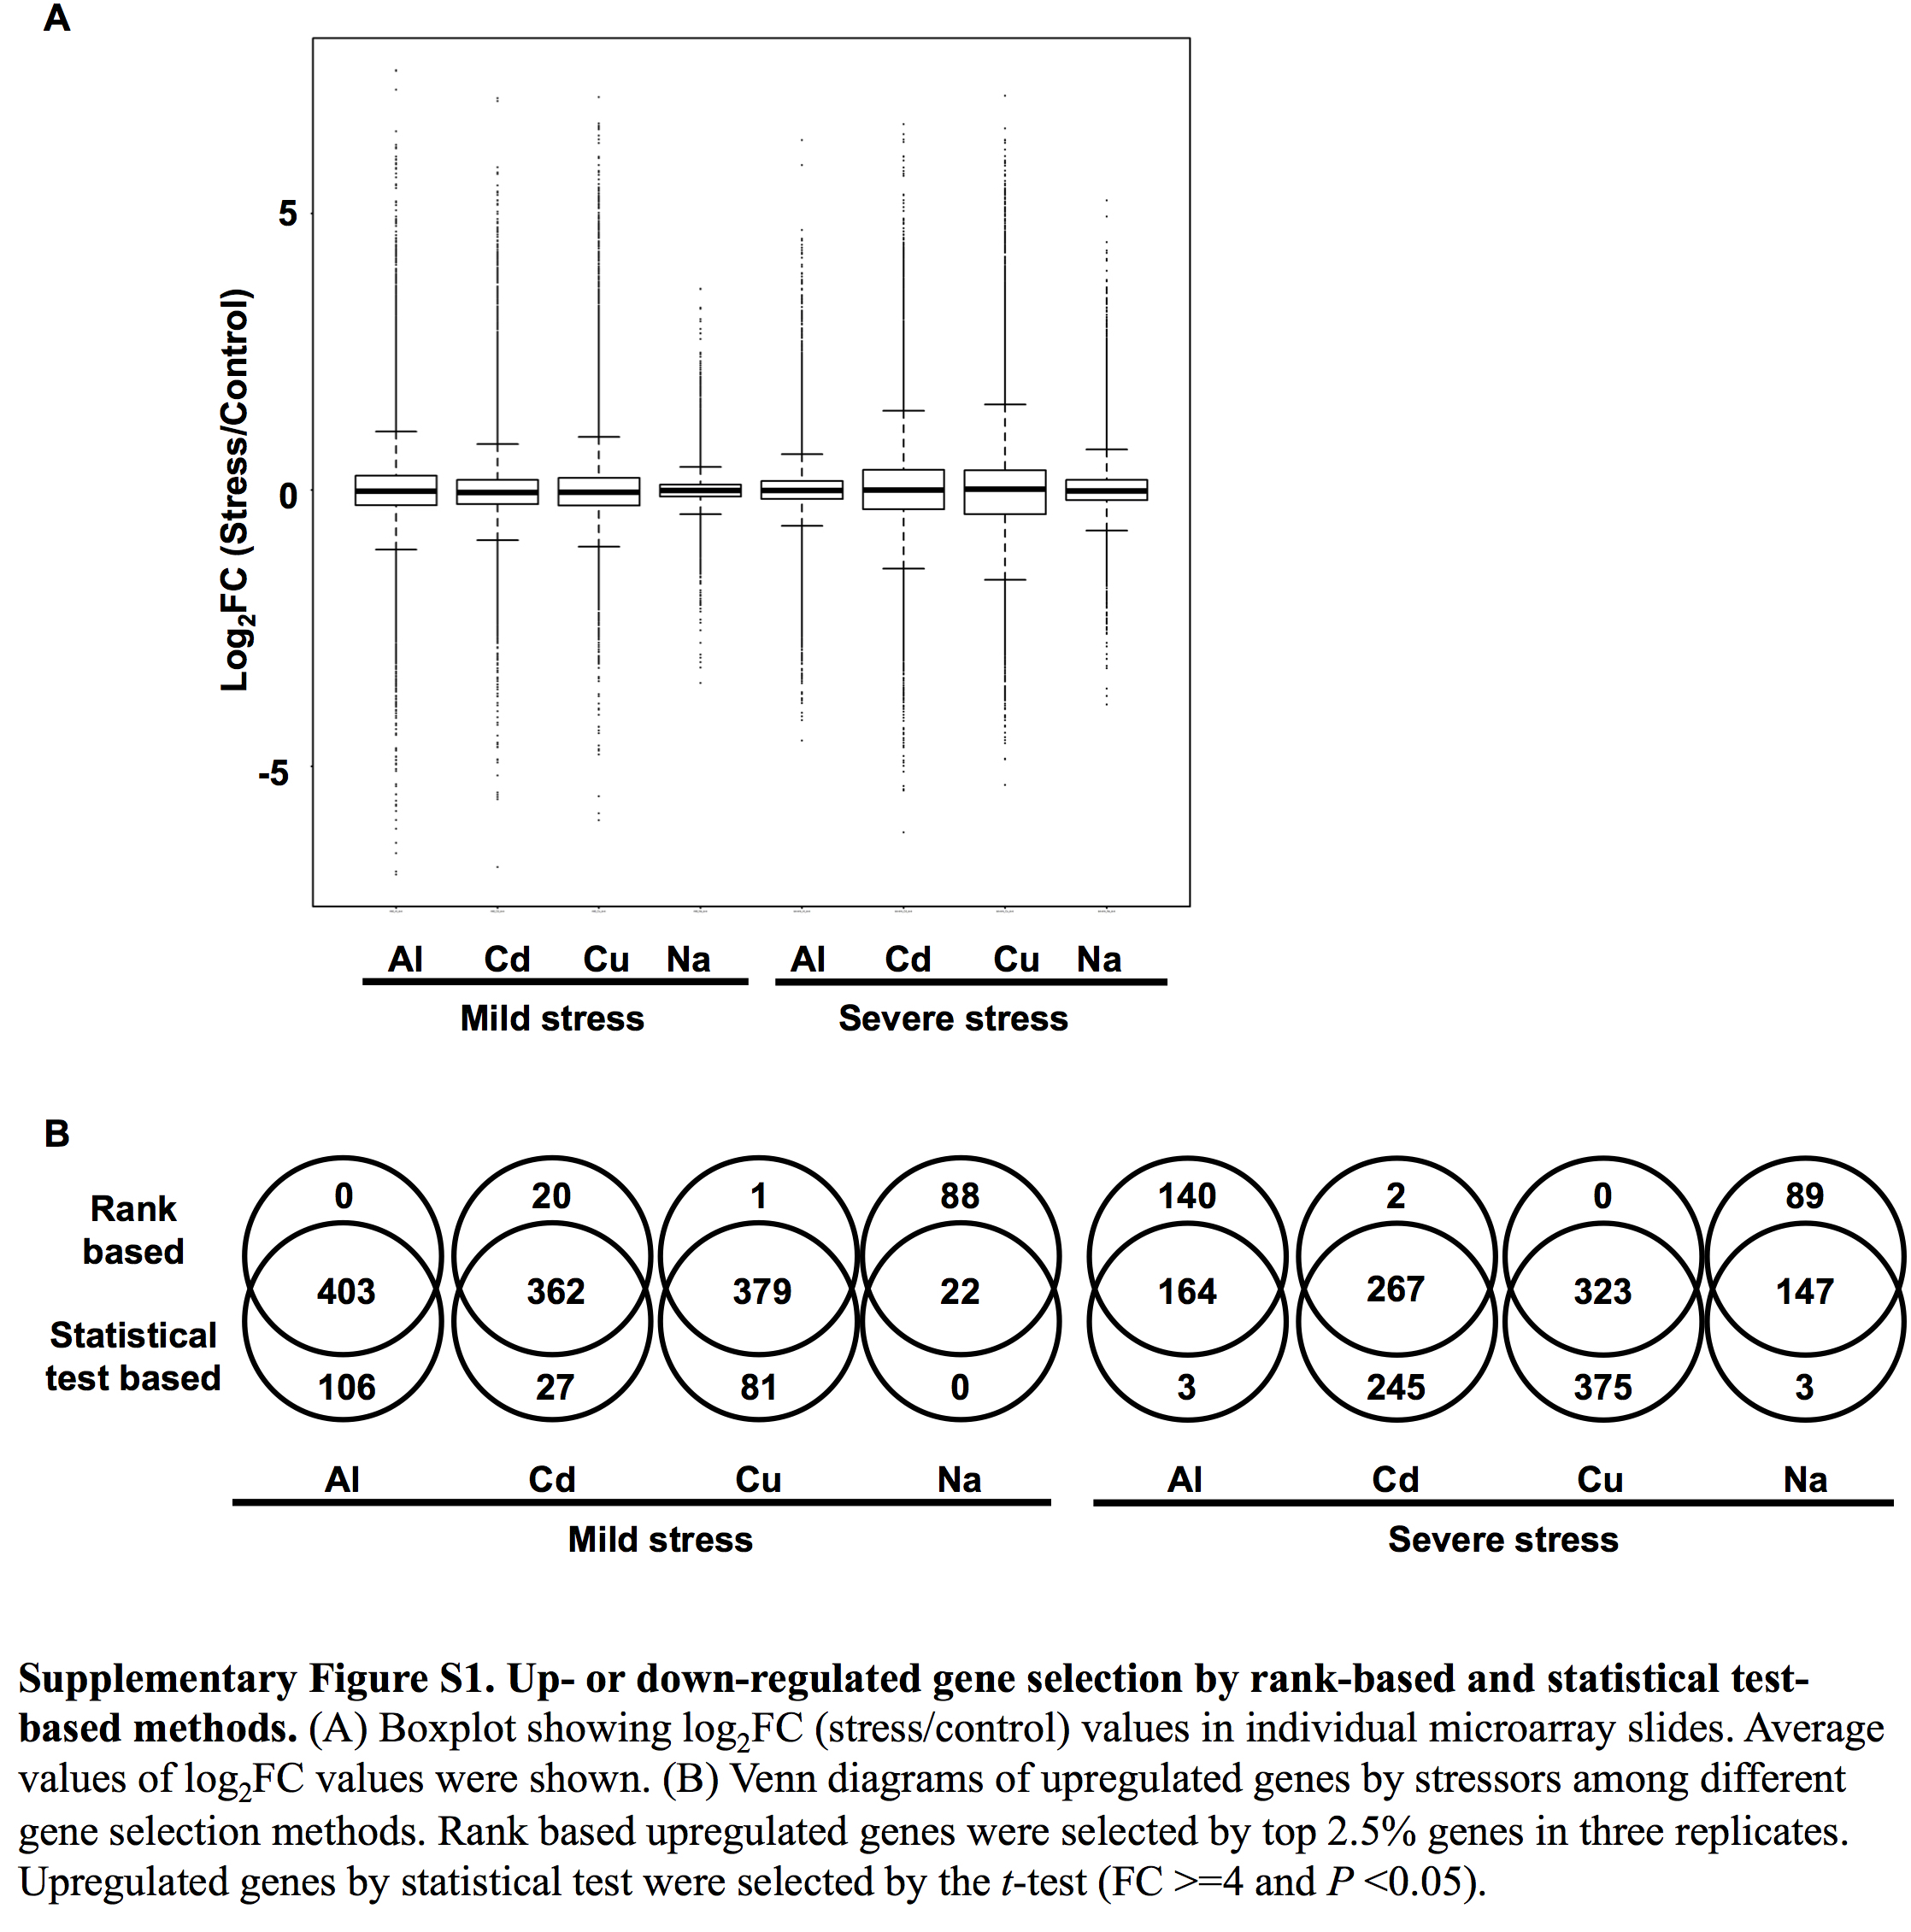

Supplement: Supplementary file 3 [file 1 › tssp_a_1454253_sm3276.jpg]
